# Supplementary material for: Intermittent theta burst stimulation applied during early rehabilitation after stroke: study protocol for a randomised controlled trial
Source: PubMed Central journal article supplement — BMJ Open. 2019 Dec 30;9(12):e034088. doi: 10.1136/bmjopen-2019-034088 (PMC6955550; doi:10.1136/bmjopen-2019-034088), 2019-12-30
Supplement: bmjopen-2019-034088.draft_revisions.pdf [file bmjopen-2019-034088.draft_revisions.pdf]

# BMJ Open

BMJ Open is committed to open peer review. As part of this commitment we make the peer review history of every article we publish publicly available.

When an article is published we post the peer reviewers' comments and the authors' responses online. We also post the versions of the paper that were used during peer review. These are the versions that the peer review comments apply to.

The versions of the paper that follow are the versions that were submitted during the peer review process. They are not the versions of record or the final published versions. They should not be cited or distributed as the published version of this manuscript.

BMJ Open is an open access journal and the full, final, typeset and author-corrected version of record of the manuscript is available on our site with no access controls, subscription charges or pay-per-view fees (<http://bmjopen.bmj.com>).

If you have any questions on BMJ Open's open peer review process please email [info.bmjopen@bmj.com](mailto:info.bmjopen@bmj.com)

# BMJ Open

## Intermittent Theta Burst Stimulation applied during early rehabilitation after stroke: Study protocol for a randomized controlled trial

|                               |                                                                                                                                                                                                                                                                                                                                                                                                                                                                                                                                                                                                                                                                                                                                                                                                                                                                                                                                                                                                                                                                                                                                                                                                                                                                   |
|-------------------------------|-------------------------------------------------------------------------------------------------------------------------------------------------------------------------------------------------------------------------------------------------------------------------------------------------------------------------------------------------------------------------------------------------------------------------------------------------------------------------------------------------------------------------------------------------------------------------------------------------------------------------------------------------------------------------------------------------------------------------------------------------------------------------------------------------------------------------------------------------------------------------------------------------------------------------------------------------------------------------------------------------------------------------------------------------------------------------------------------------------------------------------------------------------------------------------------------------------------------------------------------------------------------|
| Journal:                      | <i>BMJ Open</i>                                                                                                                                                                                                                                                                                                                                                                                                                                                                                                                                                                                                                                                                                                                                                                                                                                                                                                                                                                                                                                                                                                                                                                                                                                                   |
| Manuscript ID                 | bmjopen-2019-034088                                                                                                                                                                                                                                                                                                                                                                                                                                                                                                                                                                                                                                                                                                                                                                                                                                                                                                                                                                                                                                                                                                                                                                                                                                               |
| Article Type:                 | Protocol                                                                                                                                                                                                                                                                                                                                                                                                                                                                                                                                                                                                                                                                                                                                                                                                                                                                                                                                                                                                                                                                                                                                                                                                                                                          |
| Date Submitted by the Author: | 05-Sep-2019                                                                                                                                                                                                                                                                                                                                                                                                                                                                                                                                                                                                                                                                                                                                                                                                                                                                                                                                                                                                                                                                                                                                                                                                                                                       |
| Complete List of Authors:     | Hensel, Lukas; Faculty of Medicine and University Hospital Cologne, University of Cologne, Department of Neurology<br>Grefkes, Christian; Faculty of Medicine and University Hospital Cologne, University of Cologne, Department of Neurology; Research Centre Jülich, Cognitive Neuroscience, Institute of Neuroscience and Medicine (INM-3)<br>Tscherpel, Caroline; Faculty of Medicine and University Hospital Cologne, University of Cologne, Department of Neurology; Research Centre Jülich, Cognitive Neuroscience, Institute of Neuroscience and Medicine (INM-3)<br>Ringmaier, Corinna; Faculty of Medicine and University Hospital Cologne, University of Cologne, Department of Neurology<br>Kraus, Daria; Clinical Trials Center Cologne (CTCC)<br>Hamacher, Stefanie; Faculty of Medicine and University Hospital Cologne, University of Cologne, Institute of Medical Statistics and Computational Biology<br>Volz, Lukas; Faculty of Medicine and University Hospital Cologne, University of Cologne, Department of Neurology<br>Fink, Gereon; Faculty of Medicine and University Hospital Cologne, University of Cologne, Department of Neurology; Research Centre Jülich, Cognitive Neuroscience, Institute of Neuroscience and Medicine (INM-3) |
| Keywords:                     | rehabilitation, hemiparesis, iTBS, TMS, motor recovery                                                                                                                                                                                                                                                                                                                                                                                                                                                                                                                                                                                                                                                                                                                                                                                                                                                                                                                                                                                                                                                                                                                                                                                                            |
|                               |                                                                                                                                                                                                                                                                                                                                                                                                                                                                                                                                                                                                                                                                                                                                                                                                                                                                                                                                                                                                                                                                                                                                                                                                                                                                   |

SCHOLARONE™  
Manuscripts

1  
2  
3 **Intermittent Theta Burst Stimulation applied during early**  
4 **rehabilitation after stroke: Study protocol for a randomized**  
5 **controlled trial**  
6  
7  
8  
9

10  
11  
12 Lukas Hensel\*<sup>1</sup>, Christian Grefkes\*<sup>1, 2</sup>, Caroline Tscherpel<sup>1, 2</sup>, Corinna Ringmaier<sup>1</sup>, Daria  
13 Kraus<sup>3</sup>, Stefanie Hamacher<sup>4</sup>, Lukas J. Volz<sup>1</sup>, Gereon R. Fink<sup>1, 2</sup>  
14

15 <sup>1</sup> *Department of Neurology, Faculty of Medicine and University Hospital Cologne, University of Cologne, Cologne,*  
16 *Germany*

17  
18 <sup>2</sup> *Institute of Neurosciences and Medicine (INM-1), Juelich Research Centre, Juelich, Germany*

19  
20 <sup>3</sup> *Clinical Trials Center Cologne (CTCC), Cologne, Germany.*

21  
22 <sup>4</sup> *Institute of Medical Statistics and Computational Biology, Faculty of Medicine and University Hospital Cologne,*  
23 *University of Cologne, Cologne, Germany*  
24

25  
26 *\*Shared First-Authorship*  
27  
28  
29  
30  
31  
32

33 Word count: 3909  
34  
35

36  
37 Running title: iTBS in early stroke rehabilitation  
38  
39  
40  
41  
42

43 *\*Correspondence should be addressed to:*  
44  
45

46 Prof. Dr. Gereon R. Fink  
47

48 Department of Neurology,  
49

50 University of Cologne,  
51

52 Kerpener Str. 62,  
53

54 50937 Cologne, Germany  
55  
56

57 Email: gereon.fink@uk-koeln.de  
58  
59  
60

## Abstract

**Introduction:** Intermittent theta burst stimulation (iTBS) applied to primary motor cortex (M1) has been shown to modulate both the excitability and connectivity of the motor system. A recent proof-of-principle study, based on a small group of hospitalized stroke patients due to acute cerebral ischemia, suggested that adding iTBS (applied over the ipsilesional M1) to physiotherapy early after stroke for five consecutive days can amplify motor recovery with lasting after-effects. A randomized controlled clinical trial using a double-blind design is warranted to justify the implementation of iTBS-assisted motor rehabilitation in the neurorehabilitation from an acute ischemic stroke.

**Methods/design:** We investigate the effects of daily iTBS on early motor rehabilitation after stroke in an investigator-initiated, longitudinal randomized controlled trial. Patients (n=150) with hemiparesis receive iTBS (600 pulses) applied to the ipsilesional motor cortex (M1) or a control site (i.e., the parieto-occipital vertex). On eight consecutive workdays, a 45 min arm-centered motor training follows the intervention. The relative grip strength defined as the grip force ratios of the affected and unaffected hand serves as the primary outcome parameter. Secondary outcome parameters are measures of arm function (Action Research Arm Test, Fugl-Meyer Motor Scale), stroke severity (National Institutes of Health stroke scale), stroke-induced disability (modified Rankin Scale, Barthel Index), duration of inpatient rehabilitation, quality of life (EuroQol 5D), motor evoked potentials (MEP), and the resting motor threshold (RMT) of the ipsilesional M1.

**Discussion:** The results of this trial will clarify whether combining iTBS with physiotherapy early after stroke amplifies motor recovery in a clinical setting. The sample size enables subgroup analyses aiming at identifying response predictors.

**Ethics and dissemination:** The local ethics board provided ethics approval. We will submit the results of the study for publication in a peer-reviewed journal regardless of whether the results are positive, negative, or inconclusive.

1  
2  
3 **Keywords:** rehabilitation, hemiparesis, iTBS, TMS, motor recovery  
4  
5  
6  
7

8  
9 **Article Summary**  
10

11 *Strengths and limitations of this study*  
12

- 13  
14  
15 • The present study is a randomized, controlled, double-blind, single-center trial  
16 assessing the efficacy of iTBS in patients with acute cerebral ischemia.  
17  
18 • Interventions are applied before daily physiotherapy in the first few days after stroke  
19 since previous work suggests higher neural plasticity during the acute, compared to the  
20 chronic phase.  
21  
22 • Patients receive iTBS during their hospitalization warranting the adequate assessment  
23 of adverse events.  
24  
25 • A limitation of the study is a potential selection bias, given the patients' expected  
26 comorbidities, which may pose a risk for the application of repetitive transcranial  
27 magnetic stimulation or compromise the ability to provide informed consent.  
28  
29  
30  
31  
32  
33  
34  
35  
36  
37  
38  
39  
40  
41  
42  
43  
44  
45  
46  
47  
48  
49  
50  
51  
52  
53  
54  
55  
56  
57  
58  
59  
60

## Introduction

Stroke is one of the leading causes of acquired long-term disability in adults worldwide. From 1990 to 2010, the prevalence of stroke has reached numbers of 500-1000 per 100 000 people in North America and European countries [1]. Although recent developments in the acute treatment of a stroke such as, e.g., thrombolysis or thrombectomy, effectively reduce both morbidity and mortality after a stroke [2], the majority of patients is still left with permanent motor deficits. More than 50 % of stroke survivors develop a persisting impairment, affecting the patients' activities of daily living [3,4].

Functional recovery has been shown to arise, at least in part, from the reorganization of functional brain networks, with intact neural structures compensating the loss of specialized neural circuitry damaged by the lesion [5,6]. Importantly, a focal brain lesion as induced by a stroke also interferes with the neural processing in distant brain regions, thereby affecting the brain at a network level. In this context, neuroimaging studies have frequently reported altered brain activity in motor-related cortical areas of both hemispheres, even for lesions affecting primarily deep white matter [7-9]. Longitudinal data revealed that in the first days after stroke, the activity of primary motor cortex is typically decreased, particularly in patients with severe motor deficits despite structurally intact motor cortex [8]. This pattern is typically followed by a bihemispheric increase of activity, which correlates with the amount of early motor recovery. However, best predictors for functional motor recovery are high levels of activity in the ipsilesional motor cortex as well as an activity pattern lateralized to the ipsilesional hemisphere [10,11]. Thus, restoring neural activation, particularly in the lesioned hemisphere, seems to be essential for functional recovery after stroke.

Comparable effects have been found for changes of motor-cortical excitability as probed by transcranial magnetic stimulation (TMS) [12]. In parallel to the initial decrease of neural activation observed in the ipsilesional M1 [8], TMS studies have also found lower excitability of this region, which correlated with the severity and prognosis of motor deficits [13,14].

1  
2  
3 To date, first-line rehabilitative strategies of improving motor deficits are based on functional  
4 training, i.e., physical or occupational therapy early after stroke [15,16]. Such behavioral  
5 interventions have been demonstrated to facilitate neural reorganization [17]. Accumulating  
6 evidence suggests that non-invasive brain stimulation techniques such as repetitive TMS  
7 (rTMS) may enhance neuroplasticity, thereby facilitating neural reorganization and recovery  
8 from stroke deficits [18,19]. Particularly the observation of decreased ipsilesional excitability  
9 early after stroke has led to the hypothesis that rTMS may be capable of increasing excitability  
10 and thus aiding functional recovery [20]. This effect has been demonstrated for different rTMS  
11 protocols varying in stimulation frequency, pattern, and the number of pulses [21,22]. Of note,  
12 rTMS may not only aid neural reorganization within the stimulated region but also modulates  
13 the activity of interconnected brain regions, e.g., the dorsal premotor cortex or the  
14 supplementary motor area, as shown for both healthy subjects [23] and stroke patients [24].  
15 Thus, rTMS applied to M1 likely results in a system-wide change of neural activity in both  
16 hemispheres. At the behavioral level, proof-of-principle studies indicate that a single session  
17 of rTMS applied to ipsilesional M1 may transiently improve motor function of the paretic hand  
18 [25,26]. Further, a critical factor for a therapeutic effect seems to be the combination of  
19 plasticity-enhancing interventions with motor training, possibly leading to a better consolidation  
20 of (re-)learned motor skills [27-29].

21  
22  
23 While several rTMS studies in stroke patients reported transient improvements in motor  
24 function, other studies failed to demonstrate lasting beneficial effects [30-33]. For example, a  
25 recently published randomized controlled trial (RCT) with a large sample size (n=167) failed to  
26 demonstrate a beneficial effect of contralesional 1 Hz stimulation paired with arm motor training  
27 in chronic stroke patients, despite promising data from a relatively large number of pilot studies  
28 with small sample sizes (usually 10-20 patients). One likely reason may be the time window of  
29 intervention, which, in most studies, targeted the chronic phase after stroke.

30  
31  
32 Substantial functional recovery alongside high levels of neural plasticity is observed in the  
33 acute and subacute phase after stroke [34]. In contrast, the effectiveness of behavioral

1  
2  
3 interventions gets more and more limited the more time elapsed since the onset of the stroke.  
4  
5 This negative effect may also be true for rTMS-mediated excitatory effects and its potential to  
6  
7 support the recovery of function and neurorehabilitation. It thus seems reasonable to also  
8  
9 conduct rehabilitative rTMS interventions in the acute and subacute phase after stroke [5].  
10  
11 Indeed, recent evidence from our group has indicated lasting beneficial effects of rTMS on  
12  
13 motor recovery in a sample of stroke patients in the first few days after stroke [24]. In this study,  
14  
15 two groups of early subacute stroke patients (each n=13, on average seven days post-stroke)  
16  
17 received intermittent theta burst stimulation (iTBS, 600 pulses, 70 % RMT) for five days either  
18  
19 covering ipsilesional M1 or a control site over the parieto-occipital vertex. Recovery of grip  
20  
21 strength as measured by the relative grip strength was stronger in the M1-stimulated group  
22  
23 than in the control-stimulated group, with the beneficial effect persisting at least three to six  
24  
25 months. Of note, the small sample size of the follow-up groups and the heterogeneity of post-  
26  
27 interventional treatments across patients preclude a reliable estimation of the clinical utility of  
28  
29 combined iTBS and physiotherapy in (sub-)acute stroke patients to date. While studies with  
30  
31 similarly small sample sizes corroborate a positive effect of M1-modulation by non-invasive  
32  
33 brain stimulation after stroke [31], large RCTs are widely lacking.  
34  
35  
36  
37

### 38 **Aims and hypotheses**

39  
40 Accordingly, this study aims to investigate the efficacy of combining iTBS over the ipsilesional  
41  
42 M1 (real) versus iTBS over a parieto-occipital control site, priming physiotherapy in the early  
43  
44 rehabilitation of stroke patients suffering from impaired hand motor function. Thereby, the main  
45  
46 goal of our study is to demonstrate the effectiveness of iTBS in supporting the recovery of  
47  
48 motor function in a sufficiently powered sample, expecting stronger rehabilitation effects on  
49  
50 relative grip strength (primary outcome parameter) in the M1-iTBS group compared to the  
51  
52 control-stimulation treated group. Furthermore, by assessing secondary outcome parameters  
53  
54 (ARAT, Fugl-Meyer assessment), we also test whether combining iTBS with physiotherapy  
55  
56 during early rehabilitation may influence more complex motor functions of the impaired upper  
57  
58 extremity. We hypothesize that the combination of physical training with iTBS over ipsilesional  
59  
60



1  
2  
3 M1 significantly enhances motor recovery after stroke compared to physical training combined  
4  
5 with control stimulation.  
6  
7  
8  
9

## 10 11 **Methods**

### 12 13 14 *Study design, recruitment, and procedure*

15  
16  
17 This randomized, controlled, double-blind, single-center trial is conducted at the Department  
18 of Neurology University Hospital Cologne, Germany. Hospitalized early subacute stroke  
19 patients (within the first 14 days post-stroke), suffering from a hand motor deficit due to  
20 ischemic stroke, are screened for study participation by a stroke-specialized neurologist.  
21 Eligible patients are invited to participate in the study by the investigator, who obtains written  
22 informed consent. Several motor scores, as well as the general neurological status and  
23 electrophysiological measures of motor-cortical excitability, are assessed at the day of  
24 enrolment (T0) as well as one day after the last iTBS intervention (T9). A longitudinal follow-  
25 up after three to six months (T10) assesses after-effects that extend into the chronic post-  
26 stroke phase. Of note, the first post-intervention assessment at T9 takes place one day after  
27 stimulation and hence does not reflect immediate stimulation after-effects. All patients undergo  
28 the same experimental procedure receiving iTBS interventions before physiotherapy on days  
29 T1-T8 (Fig. 1), the latter conducted as a routine part of the early rehabilitation program provided  
30 by the Department of Neurology, University Hospital Cologne. This program (total duration of  
31 300 min per day) includes daily physiotherapy, occupational, and speech therapy, for at least  
32 two weeks. This time frame determines the duration of the iTBS intervention phase, which  
33 aims at eight stimulations on consecutive workdays. Note that the intended stimulation period  
34 is more extended than the five stimulations employed in our pilot study [24] in order to increase  
35 the total stimulation dose. In case that 8 stimulations cannot be performed due to  
36 organizational reasons (e.g., transfer of the patient to another rehab center), a minimum of five  
37 stimulations is necessary to be included into the final analysis [24]. A stimulation period longer  
38  
39  
40  
41  
42  
43  
44  
45  
46  
47  
48  
49  
50  
51  
52  
53  
54  
55  
56  
57  
58  
59  
60

1  
2  
3 than 8 days was not considered feasible without delaying further medical plans or subsequent  
4 treatment after transfer to a rehabilitation center. Importantly, both groups receive the same  
5 amount of motor training, with cohorts solely differing in receiving M1-iTBS or control-iTBS  
6 before the physiotherapy session (for details on the trial, as standardized by the WHO, please  
7 see Tab. 1).  
8  
9  
10  
11  
12

### 13 14 15 16 17 18 *Patient and public Involvement*

19  
20  
21 The study was designed based on the available literature related to optimizing motor recovery  
22 of stroke patients using iTBS, as described in the introduction. There was no patient or public  
23 involved in designing the study. The study protocol was written using the SPIRIT  
24 guidelines [35] to enhance the quality and transparency of the trial.  
25  
26  
27  
28  
29  
30  
31  
32

### 33 34 *iTBS protocol*

35  
36 As a predominantly facilitatory rTMS protocol, iTBS has been rendered safe and effective,  
37 increasing cortical excitability in healthy subjects [36] and acute stroke patients [37]. One  
38 session of iTBS consists of 3 pulses delivered at a frequency of 50 Hz every 200 ms during 2  
39 s (10 bursts), which are repeated every 10 s for a total duration of 3.5 min (600 pulses) [36].  
40 Compared to other facilitatory rTMS protocols, the short duration of the intervention (3.5 min)  
41 enables a good integration of iTBS in training schedules even when patients are severely  
42 affected. The second advantage of iTBS is its relatively low stimulation intensity, reducing the  
43 risk of adverse reactions, particularly seizures [38]. The stimulation intensity of iTBS is  
44 individually adapted in each patient according to the excitability of the ipsilesional motor cortex.  
45 The original iTBS protocol, as published by Huang and colleagues [36], set the stimulation  
46 intensity to 80 % of the active motor threshold (AMT). However, assessment of the AMT  
47 requires subjects to perform constant contractions of the hand muscles, which is often  
48  
49  
50  
51  
52  
53  
54  
55  
56  
57  
58  
59  
60

1  
2  
3 impossible for stroke patients with severe hand motor weakness. The present study, therefore,  
4 set stimulation intensities to 70 % of the RMT, which is independent of the patients' motor  
5 abilities. Of note, using 70 % RMT instead of 80 % AMT has been repeatedly demonstrated to  
6 induce comparable aftereffects on cortical excitability [23,39,40], allowing an effective  
7 application of iTBS in stroke [24].  
8  
9  
10  
11  
12  
13  
14  
15  
16

### 17 *Inclusion- and exclusion criteria*

18  
19  
20 Inclusion and exclusion criteria are defined in line with previous iTBS studies in stroke [23,24]  
21 and the guidelines for the use of rTMS in clinical practice and research [38,41,42].  
22  
23  
24  
25

26 Inclusion criteria are:

- 27 • Written informed consent
- 28 • Age 40-90 years
- 29 • Ischemic stroke
- 30 • Hemiparesis with impaired unilateral hand motor function

31  
32  
33  
34  
35  
36 Exclusion criteria are:

- 37 • Subjects legally detained in an official institute
  - 38 • Participation in a clinical trial within the last 12 weeks
  - 39 • Electronic or ferromagnetic implants located in the head, neck or thorax (e.g., clips,  
40 intracranial shunt, artificial heart valve, pacemaker, medication pump)
  - 41 • Metal splinters in eye or head
  - 42 • Pregnancy/breastfeeding
  - 43 • Severe neurodegenerative disease (e.g., Parkinson's disease, Alzheimer's disease)
  - 44 • Severe neuroinflammatory disease (e.g., multiple sclerosis)
  - 45 • History of seizures/epilepsy
  - 46 • Physical addiction to alcohol, medication, or drugs (excluded: nicotine)
  - 47 • Insufficient compliance
- 48  
49  
50  
51  
52  
53  
54  
55  
56  
57  
58  
59  
60

- Present or past malignant tumor involving the central nervous system
- Severe psychiatric disease (e.g., schizophrenia)
- Bilateral hemiparesis or infarcts to the primary motor cortex or the corticospinal tract in the hemisphere ipsilateral to the hemiparesis
- Pre-existing cerebral infarctions with hemiparesis or pre-existing cerebral infarctions affecting the primary motor cortex or the corticospinal tract, excluding minor small vessel disease changes (e.g., clinically asymptomatic lacunae <1cm)
- Known brain lesion (surgical, traumatic)
- Evidence for enhanced cerebral pressure
- Severe cardiac dysfunction
- Life expectancy < 12 months
- NIHSS Score at enrolment > 20
- Blood glucose imbalances resistant to treatment (<50 mg/dl or >300 mg/dl)
- Elevated blood pressure resistant to treatment (RR > 185/110mmHg)
- Systemic thrombolysis using r-tPA or thrombectomy within the last 24 hours before enrolment in the study
- Medication with benzodiazepines, high-potency antipsychotics, or tricyclic antidepressants before hospitalization or long-term during hospitalization

### *Outcome measures*

The primary endpoint of this study is relative grip strength defined as of the maximum grip strength of the affected (paretic) hand compared to the unaffected hand, assessed three to six months after the intervention, i.e., in the chronic phase post-stroke. A stroke leading to hemiparesis typically reduces grip strength. In turn, recovery of grip strength usually precedes the recovery of other motor domains such as dexterity or movement speed [43]. Furthermore, grip strength seems to be mediated by contralateral M1 activity [44]. Therefore, stimulation of this region by iTBS may facilitate the recovery of grip strength during early rehabilitation [24].

1  
2  
3 Secondary endpoints comprise different measures of gross and fine upper limb function  
4 assessed by the Action Research Arm Test (ARAT [45]) and the Fugl-Meyer Motor Scale (FM  
5 [46]) of the upper extremity, stroke severity measured by the National Institutes of Health  
6 stroke scale (NIHSS), general disability (modified Rankin Scale, mRS [47]), and quality of life  
7 (EuroQol 5D including the visual analogue scale, EQ-5D). Moreover, in order to obtain  
8 electrophysiological measures of corticospinal integrity, motor evoked potentials (MEP) and  
9 the RMT of the ipsilesional M1 are included as secondary endpoints. Finally, to account for  
10 differences in rehabilitation treatments between completion of the intervention (T9) and the  
11 follow-up assessment (T10), we document the performance in activities of daily living assessed  
12 by the Barthel scale as well as the duration of stay in external rehabilitation facilities.  
13  
14  
15  
16  
17  
18  
19  
20  
21  
22  
23  
24

25 In sum, these tests provide a detailed assessment, monitoring the clinical and  
26 electrophysiological condition of patients before and after iTBS (Tab. 2).  
27  
28  
29  
30  
31  
32  
33

### 34 *Randomization and stratification*

35  
36 After obtaining informed consent, randomization is performed using the 24/7 online  
37 randomization tool ALEA (FormsVision BV, Abcoude, NL). Patients are allocated 1:1 into the  
38 intervention groups, receiving “verum” or “control” iTBS. In order to balance groups regarding  
39 potential confounding factors, randomization is stratified based on patients’ age ( $\leq 68$ ,  $>68$   
40 years), motor impairment (relative grip strength  $< 10\%$ ,  $10 - 70\%$ ,  $> 70\%$ ), and stimulation  
41 intensity ( $\leq 50\%$ ,  $> 50\%$  maximal stimulator output), as these factors are known to impact on  
42 motor recovery post-stroke [48,49].  
43  
44  
45  
46  
47  
48  
49  
50  
51  
52  
53  
54  
55

### 56 *Statistical analysis*

57  
58 After data collection, confirmatory and descriptive analyses will be conducted. In our proof-of-  
59 principle study, we obtained data from a smaller sample [22], which revealed three to six  
60

1  
2  
3 months after the intervention an increase of grip strength of  $38.1 \pm 28.7$  % in patients treated  
4 by iTBS versus  $26.2 \pm 11.7$  % in the control stimulation group. Thus, the observed effect  
5 strength amounted to 0.54. Using an unpaired t-Test with a two-sided 5 % type I error and a  
6 power of 80 %, a sample of 110 patients is required (calculated using the software G\*Power  
7 3.1.7). Assuming a drop-out rate of 25 % based on the cohort of Volz and colleagues (2016),  
8 an estimated sample of 150 recruited patients is needed.  
9

10  
11  
12 Variables are analyzed descriptively using mean, standard deviations, quantiles (0, 25, 50, 75,  
13 100), or count and frequency, respectively. The final statistical analysis is carried out in an  
14 intention to treat (ITT) collective including all patients who received at least one intervention  
15 (verum or control) with a subsequent grip strength testing, to assess the safety and efficacy of  
16 iTBS. Moreover, a supportive analysis is performed based on the “per protocol” (PP) collective,  
17 which includes all patients who underwent at least five [24] interventions (verum or control)  
18 and provided grip force measures at baseline and the three to six months follow-up.  
19

20  
21  
22 The primary endpoint, i.e., the change in grip strength after three months (T10), is analyzed  
23 using a linear mixed model with repeated measurements, in which the factors group (verum,  
24 control), time, group x time, and strata at baseline (age, motor impairment, stimulation  
25 intensity) will be entered. Moreover, the model will account for the number of data points  
26 obtained during the intervention phase (T1 – T9). The primary hypothesis is addressed using  
27 a customized test (contrast) to compare the change from baseline (T0) to three to six months  
28 (T10) between the two treatment groups. Mean difference, corresponding 95 % confidence  
29 interval, and the p-value (two-sided) will be presented.  
30

31  
32  
33 All secondary variables will be analyzed similarly or using unpaired t-tests or Mann-Whitney U  
34 tests, respectively. (Serious) Adverse events are listed. Subgroup analyses will be performed  
35 for randomization stratification variables and length of rehabilitation therapy. The current  
36 version of SPSS Statistics (IBM Corp., Armonk, NY, USA) will be used for the statistical  
37 analyses.  
38  
39  
40  
41  
42  
43  
44  
45  
46  
47  
48  
49  
50  
51  
52  
53  
54  
55  
56  
57  
58  
59  
60

### *Blinding*

The study is carried out using a double-blinded design, in which neither the patients nor the testing physicians or statisticians are aware of the intervention arm (verum or control). As applying iTBS over different stimulation sites (depending on the patients' intervention arm) implicates that physicians performing the intervention cannot be blinded, the intervention team needs to be separated into blinded physicians performing patient recruitment and examinations, and unblinded physicians exclusively applying iTBS. Thereby, we ensure that both patients and investigators are blinded during the assessment of outcome parameters throughout the entire study procedure. In the case of an emergency unblinding, investigators at the Department of Neurology have access to sealed envelopes labelled with the patients' randomization numbers. To maintain the quality of the trial, a patient's allocation should only be unblinded in exceptional circumstances when knowledge of the actual treatment is essential for the management of the patient.

### *Safety*

The exclusion criteria of the present trial follow the latest safety recommendations for rTMS [38,42], thereby reducing the risk of adverse events or reactions to iTBS to a minimum. Adverse events (AE) or serious adverse events (SAEs) are assessed throughout the entire observation period of the study, including all scheduled visits T0 – T10. All events are reported to the federal authorities (Federal Institute for Drugs and Medical Devices, BfArM). In our pilot study [24], no severe adverse event occurred, especially no focal or generalized seizures.

### *Documentation and quality assurance*

All data assessed during the trial are documented promptly after data acquisition and entered into the electronic case report form (eCRF) by the responsible investigators. Regular monitor

1  
2  
3 inspections ensure high quality of documentation and the correct implementation of the study  
4 protocol. The Clinical Trials Centre Cologne (CTCC Cologne) is responsible for the monitoring.  
5  
6 Besides the initiation visit at the beginning and the close-out visit at the end of the study,  
7  
8 monitoring visits are performed on average after every tenth patient included. Thus, at least  
9  
10 15 visits are scheduled. Monitoring visits include a review of source data documented in the  
11  
12 eCRF, written consent, inclusion and exclusion criteria.  
13  
14  
15  
16  
17  
18  
19

### 20 *Data collection and management*

21  
22  
23 CTCC Cologne performs the data management. The commercial online software TrialMaster™  
24  
25 (OmniComm.com) is used as a data management system, ensuring data safety by a firewall  
26  
27 and backup system, including multiple data storage sites. The database was developed and  
28  
29 validated by the CTCC Cologne.  
30  
31

32  
33 All data collectors are stroke-specialized neurologists who have been trained in good clinical  
34  
35 practice (GCP). After the investigators enter the data into the eCRF, the CTCC Cologne  
36  
37 reviews the data for completeness and plausibility. The data manager and investigators  
38  
39 resolve discrepancies and implausible entries.  
40  
41

42  
43 Only researchers involved in the data collection, management and data analysis will have  
44  
45 access to the final dataset. However, the principal investigator allows direct access to all  
46  
47 source data and documents at monitoring, and inspection from federal authorities (Federal  
48  
49 Institute for Drugs and Medical Devices, BfArM).  
50  
51  
52  
53

### 54 **Discussion**

55  
56  
57 This prospective, randomized, controlled, double-blind clinical trial investigates the effects of  
58  
59 combining iTBS with physiotherapy during the early rehabilitation phase on hand motor  
60



1  
2  
3 recovery after a stroke-induced motor impairment. While training-based approaches including  
4 physical therapy and occupational therapy constitute the standard of rehabilitation treatment  
5 [15,50], the present study tests in a relatively large sample of stroke patients whether priming  
6 motor training by non-invasive plasticity-induction in ipsilesional M1 immediately before the  
7 training session may amplify motor recovery.  
8  
9  
10  
11  
12

13  
14 Previous studies, often conducted in the chronic phase after stroke, showed that both  
15 facilitatory rTMS over ipsilesional M1 and inhibitory rTMS over contralesional M1 can result in  
16 improved motor performance of the stroke-affected hand. However, daily interventions using  
17 rTMS in chronic stroke patients before motor training have led to inconsistent findings  
18 [19,51,52]. The first large sample (n=167) trial (NICHE trial) recently revealed that application  
19 of inhibitory rTMS over contralesional M1 in chronic stroke patients did not facilitate motor  
20 recovery compared to control stimulation [53]. Of note, the highest levels of neural plasticity  
21 have been found in the first few days and weeks after stroke [34]. Thus, the amplification of  
22 neuroplasticity using rTMS may be most effective during the acute and early subacute phase  
23 after a stroke. While data on neuromodulatory effects within the first few days and weeks after  
24 stroke remain scarce, recent findings suggest that increasing excitability of ipsilesional M1  
25 using rTMS early after stroke may induce lasting beneficial effects on motor performance [24].  
26  
27 These findings support the hypothesis that rTMS may be applied in addition to physiotherapy  
28 to induce plasticity in the ipsilesional M1 and thereby promote motor outcome. As shown by  
29 fMRI before and after the rTMS intervention, patients in the verum rTMS group showed  
30 increased functional connectivity between the modulated stimulation site and a functionally  
31 related motor network including the dorsal premotor cortex and the supplementary motor area,  
32 compared with patients in the control stimulation group [24]. Given that without rTMS  
33 intervention patients during the first few days after stroke feature a loss of activity and  
34 connectivity in the ipsilesional hemisphere [54,55], the finding of increased connectivity with  
35 the verum stimulation site suggests that the beneficial effects of rTMS may not only result from  
36 inducing plasticity locally in M1, but also from enhancing connectivity with a functionally related  
37 motor network.  
38  
39  
40  
41  
42  
43  
44  
45  
46  
47  
48  
49  
50  
51  
52  
53  
54  
55  
56  
57  
58  
59  
60

1  
2  
3 It is important to note that the data mentioned above rely on samples rarely exceeding n=15  
4 patients per intervention arm. Since stroke patients are highly heterogeneous due to the  
5 interindividual variability of lesion location and size, neurological impairment, age, and  
6 medication, trials with larger samples are needed to systematically assess the impact of rTMS  
7 in the rehabilitation after stroke [19]. As mentioned above, the first large sample (n=167) trial  
8 (NICHE trial) recently revealed that application of inhibitory rTMS over contralesional M1 in  
9 *chronic* stroke patients did not facilitate motor recovery compared to control stimulation [53].  
10  
11 The present study is the first study with a large sample of *subacute* stroke patients (n=150),  
12 systematically assessing clinical deficits, structural images, comorbidity, and medication.  
13 Besides the sample size, a significant strength of the current study is its comprehensive  
14 monitoring of clinical and electrophysiological data, comprising clinical examinations and  
15 standardized scores before, during, and at least three months after the application of iTBS.  
16 Importantly, this randomized controlled trial is equipped with sufficient power to reveal either  
17 an effect of iTBS or an equally meaningful null result.  
18  
19

20  
21  
22 The stratification of age, motor deficit, and stimulation intensity further allows dissociating  
23 intervention effects in different subgroups. Considering the factors mentioned above of each  
24 patient is a critical step for implementing non-invasive brain stimulation in individualized  
25 rehabilitation programs in the future [56]. Similar to other rTMS studies in stroke patients, the  
26 present trial features the limitation of a potential selection bias, given the patients' expected  
27 comorbidities: Stroke is associated with comorbidities posing a risk for the application rTMS  
28 (i.e., structural epilepsy, cardiac pacemakers) and conditions compromising the ability to  
29 provide informed consent (i.e., aphasia, diminished level of consciousness) [57,58].  
30  
31

32  
33  
34 In summary, this study is the first randomized controlled trial probing the efficacy of iTBS on  
35 the primary motor cortex during motor rehabilitation in the first few weeks after stroke. The trial  
36 is sufficiently powered to detect positive or negative effects and to account for confounding  
37 factors. Together with other recently started large-scale RCTs on tDCS and rTMS in the  
38 contralesional hemisphere ([www.clinicaltrials.gov](http://www.clinicaltrials.gov)), the findings of this trial will hopefully  
39  
40  
41  
42  
43  
44  
45  
46  
47  
48  
49  
50  
51  
52  
53  
54  
55  
56  
57  
58  
59  
60

1  
2  
3  
4  
5  
6  
7  
8  
9  
10  
11  
12  
13  
14  
15  
16  
17  
18  
19  
20  
21  
22  
23  
24  
25  
26  
27  
28  
29  
30  
31  
32  
33  
34  
35  
36  
37  
38  
39  
40  
41  
42  
43  
44  
45  
46  
47  
48  
49  
50  
51  
52  
53  
54  
55  
56  
57  
58  
59  
60

improve our understanding of how to translate non-invasive brain stimulation into clinical practice, thereby improving rehabilitation for stroke patients.

For peer review only

## Trial status

At the time of submission, recruitment has not been completed.

## Abbreviations

AE: adverse event, AMT: active motor threshold, ARAT: Action Research Arm Test, CTCC: Clinical Trials Center Cologne, eCRF: electronic case report form; rTMS: repetitive Transcranial magnetic stimulation; EV: Evaluation visit, FM: Fugl-Meyer Motor Scale of the upper extremity, GCP: good clinical practice, iTBS: intermittent theta-burst stimulation, M1: primary motor cortex, MEP: motor evoked potential, mRS: modified Rankin Scale, NIHSS: National Institutes of Health stroke scale, tDCS: transcranial direct current stimulation, RCT: randomized controlled trial, RMT: resting motor threshold, r-tPA: recombinant tissue-type plasminogen activator, SAE: serious adverse event

## Funding

This trial is supported by the Max-Delbrück Prize to GRF and by the University of Cologne Emerging Groups Initiative (CONNECT group; CG and GRF) implemented into the Institutional Strategy of the University of Cologne and the German Excellence Initiative.

## Author contributions

CG, LH, LJV, and GRF developed the study design and wrote the statistical analysis plan in collaboration with DK and SH. LH, CR, CG, and GRF perform the clinical evaluation. CT conducts rTMS interventions. LH and CG wrote the first draft of the manuscript. CT, LJV, and GRF revised it for intellectual content. All authors read and approved the final manuscript.

**Sponsor**

University of Cologne, Albertus-Magnus-Platz 50923 Cologne

**Competing interests**

None of the authors have anything to disclose.

**Ethics approval and consent to participate**

The ethics board of the University Hospital of Cologne (reference number 15 - 343) approved the study and its amendments:

First approval November 2<sup>nd</sup> 2015 (original version).

Amendment (version 2.22) approved and implemented December 20<sup>th</sup> 2016. Specification of exclusion criteria.

Amendment (version 3) approved and implemented November 15<sup>th</sup> 2018. Change of inclusion and exclusion criteria.

Written informed consent is obligatory before study participation. The study is registered at the German Clinical Trials Register (DRKS, [www.drks.de](http://www.drks.de), DRKS-ID: DRKS00008963) and the ClinicalTrials.gov database (Identifier: NCT02910024).

## References

- 1 Feigin VL, Forouzanfar MH, Krishnamurthi R, *et al.* Global and regional burden of stroke during 1990-2010: findings from the Global Burden of Disease Study 2010. *Lancet* 2014;**383**:245–54.
- 2 Saver JL, Goyal M, Bonafe A, *et al.* Stent-retriever thrombectomy after intravenous t-PA vs. t-PA alone in stroke. *N Engl J Med* 2015;**372**:2285–95. doi:10.1056/NEJMoa1415061
- 3 Gresham GE, Fitzpatrick TE, Wolf PA, *et al.* Residual disability in survivors of stroke--the Framingham study. *N Engl J Med* 1975;**293**:954–6. doi:10.1056/NEJM197511062931903
- 4 Carod-Artal J, Egido JA, González JL, *et al.* Quality of life among stroke survivors evaluated 1 year after stroke: experience of a stroke unit. *Stroke* 2000;**31**:2995–3000.
- 5 Cramer SC. Repairing the human brain after stroke: I. Mechanisms of spontaneous recovery. *Ann Neurol* 2008;**63**:272–87. doi:10.1002/ana.21393
- 6 Nudo RJ. Recovery after brain injury: mechanisms and principles. *Frontiers in Human Neuroscience* 2013;**7**:887. doi:10.3389/fnhum.2013.00887
- 7 Chollet F, DiPiero V, Wise RJ, *et al.* The functional anatomy of motor recovery after stroke in humans: a study with positron emission tomography. *Ann Neurol* 1991;**29**:63–71. doi:10.1002/ana.410290112
- 8 Ward NS, Brown MM, Thompson AJ, *et al.* Neural correlates of motor recovery after stroke: a longitudinal fMRI study. *Brain* 2003;**126**:2476–96. doi:10.1093/brain/awg245
- 9 Grefkes C, Nowak DA, Eickhoff SB, *et al.* Cortical connectivity after subcortical stroke assessed with functional magnetic resonance imaging. *Ann Neurol* 2008;**63**:236–46. doi:10.1002/ana.21228
- 10 Rehme AK, Volz LJ, Feis D-L, *et al.* Individual prediction of chronic motor outcome in the acute post-stroke stage: Behavioral parameters versus functional imaging. *Hum Brain Mapp* 2015;**36**:4553–65. doi:10.1002/hbm.22936
- 11 Rehme AK, Eickhoff SB, Rottschy C, *et al.* Activation likelihood estimation meta-analysis of motor-related neural activity after stroke. *NeuroImage* 2012;**59**:2771–82. doi:10.1016/j.neuroimage.2011.10.023
- 12 Volz LJ, Hamada M, Rothwell JC, *et al.* What Makes the Muscle Twitch: Motor System Connectivity and TMS-Induced Activity. *Cerebral Cortex* Published Online First: 7 March 2014. doi:10.1093/cercor/bhu032
- 13 Pennisi G, Alagona G, Rapisarda G, *et al.* Transcranial magnetic stimulation after pure motor stroke. *Clin Neurophysiol* 2002;**113**:1536–43.
- 14 Stinear CM, Barber PA, Petoe M, *et al.* The PREP algorithm predicts potential

- 1  
2  
3 for upper limb recovery after stroke. *Brain* 2012;**135**:2527–35.  
4 doi:10.1093/brain/aws146  
5
- 6  
7 15 Maulden SA, Gassaway J, Horn SD, *et al.* Timing of initiation of rehabilitation  
8 after stroke. *Arch Phys Med Rehabil* 2005;**86**:S34–S40.  
9 doi:10.1016/j.apmr.2005.08.119
- 10  
11 16 Pollock A, Farmer SE, Brady MC, *et al.* Interventions for improving upper limb  
12 function after stroke. *Cochrane Database Syst Rev* 2014;**23**:CD010820.  
13 doi:10.1002/14651858.CD010820.pub2  
14
- 15  
16 17 Pin-Barre C, plasticity JLN, 2015. Physical exercise as a diagnostic,  
17 rehabilitation, and preventive tool: influence on neuroplasticity and motor  
18 recovery after stroke. *Hindawicom*, doi:10.1155/2015/608581
- 19  
20 18 Grefkes C, Fink GR. Disruption of motor network connectivity post-stroke and  
21 its noninvasive neuromodulation. *Current Opinion in Neurology* 2012;**25**:670–5.  
22 doi:10.1097/WCO.0b013e3283598473  
23
- 24  
25 19 Grefkes C, Fink GR. Noninvasive brain stimulation after stroke: it is time for  
26 large randomized controlled trials! *Current Opinion in Neurology* 2016;**29**:714–  
27 20. doi:10.1097/WCO.0000000000000395
- 28  
29 20 Hummel FC, Cohen LG. Non-invasive brain stimulation: a new strategy to  
30 improve neurorehabilitation after stroke? *Lancet Neurol* 2006;**5**:708–12.  
31 doi:10.1016/S1474-4422(06)70525-7  
32
- 33  
34 21 Hummel FC, Cohen LG. Non-invasive brain stimulation: a new strategy to  
35 improve neurorehabilitation after stroke? *The Lancet Neurology* 2006;**5**:708–12.  
36 doi:10.1016/S1474-4422(06)70525-7
- 37  
38 22 Ziemann U. Improving disability in stroke with RTMS. *Lancet Neurol*  
39 2005;**4**:454–5. doi:10.1016/S1474-4422(05)70126-5  
40
- 41  
42 23 Nettekoven C, Volz LJ, Kutscha M, *et al.* Dose-dependent effects of theta burst  
43 rTMS on cortical excitability and resting-state connectivity of the human motor  
44 system. *Journal of Neuroscience* 2014;**34**:6849–59.  
45 doi:10.1523/JNEUROSCI.4993-13.2014
- 46  
47 24 Volz LJ, Rehme AK, Michely J, *et al.* Shaping Early Reorganization of Neural  
48 Networks Promotes Motor Function after Stroke. *Cerebral Cortex*  
49 2016;**26**:2882–94. doi:10.1093/cercor/bhw034
- 50  
51 25 Ameli M, Grefkes C, Kemper F, *et al.* Differential effects of high-frequency  
52 repetitive transcranial magnetic stimulation over ipsilesional primary motor  
53 cortex in cortical and subcortical middle cerebral artery stroke. *Ann Neurol*  
54 2009;**66**:298–309. doi:10.1002/ana.21725  
55
- 56  
57 26 Khedr EM, Ahmed MA, Fathy N, *et al.* Therapeutic trial of repetitive transcranial  
58 magnetic stimulation after acute ischemic stroke. *Neurology* 2005;**65**:466–8.  
59 doi:10.1212/01.wnl.0000173067.84247.36  
60
- 27 Ackerley SJ, Stinear CM, Barber PA, *et al.* Combining theta burst stimulation



- 1  
2  
3 with training after subcortical stroke. *Stroke* 2010;**41**:1568–72.  
4 doi:10.1161/STROKEAHA.110.583278  
5
- 6 28 Talelli P, Wallace A, Dileone M, *et al.* Theta burst stimulation in the  
7 rehabilitation of the upper limb: a semirandomized, placebo-controlled trial in  
8 chronic stroke patients. *Neurorehabil Neural Repair* 2012;**26**:976–87.  
9 doi:10.1177/1545968312437940  
10
- 11 29 Reis J, Robertson EM, Krakauer JW, *et al.* Consensus: Can transcranial direct  
12 current stimulation and transcranial magnetic stimulation enhance motor learning  
13 and memory formation? *Brain Stimulation* 2008;**1**:363–9.  
14 doi:10.1016/j.brs.2008.08.001  
15
- 16 30 Volz LJ, Grefkes C. Basic principles of rTMS in motor recovery after stroke.  
17 *Therapeutic rTMS in Neurology* Published Online First: 2016. doi:10.1007/978-  
18 3-319-25721-1\_1  
19
- 20 31 Hsu WY, Cheng CH, Liao KK, *et al.* *Effects of Repetitive Transcranial Magnetic*  
21 *Stimulation on Motor Functions in Patients With Stroke A Meta-Analysis.* *Stroke*  
22 2012. doi:10.1161/STROKEAHA.111.649756/-/DC1  
23
- 24 32 Adeyemo BO, Simis M, Macea DD, *et al.* Systematic review of parameters of  
25 stimulation, clinical trial design characteristics, and motor outcomes in non-  
26 invasive brain stimulation in stroke. *Frontiers in Psychiatry* 2012;**3**:88.  
27 doi:10.3389/fpsy.2012.00088  
28
- 29 33 Hao Z, Wang D, Zeng Y, *et al.* Repetitive transcranial magnetic stimulation for  
30 improving function after stroke. *Cochrane Database Syst Rev*  
31 2013;**78**:CD008862. doi:10.1002/14651858.CD008862.pub2  
32
- 33 34 Buma F, Kwakkel G, Ramsey N. Understanding upper limb recovery after stroke.  
34 *Restor Neurol Neurosci* 2013;**31**:707–22. doi:10.3233/RNN-130332  
35
- 36 35 Chan A-W, Tetzlaff JM, Altman DG, *et al.* SPIRIT 2013 statement: defining  
37 standard protocol items for clinical trials. *American College of Physicians* 2013.  
38 200–7. doi:10.7326/0003-4819-158-3-201302050-00583  
39
- 40 36 Huang Y-Z, Edwards MJ, Rounis E, *et al.* Theta burst stimulation of the human  
41 motor cortex. *Neuron* 2005;**45**:201–6. doi:10.1016/j.neuron.2004.12.033  
42
- 43 37 Di Lazzaro V, Profice P, Pilato F, *et al.* Motor cortex plasticity predicts recovery  
44 in acute stroke. *Cerebral Cortex* 2010;**20**:1523–8. doi:10.1093/cercor/bhp216  
45
- 46 38 Rossi S, Hallett M, Rossini PM, *et al.* Safety, ethical considerations, and  
47 application guidelines for the use of transcranial magnetic stimulation in clinical  
48 practice and research. 2009;**120**:2008–39. doi:10.1016/j.clinph.2009.08.016  
49
- 50 39 Cárdenas-Morales L, Volz LJ, Michely J, *et al.* Network connectivity and  
51 individual responses to brain stimulation in the human motor system. *Cerebral*  
52 *Cortex* 2014;**24**:1697–707. doi:10.1093/cercor/bht023  
53
- 54 40 Gentner R, Wankerl K, Reinsberger C, *et al.* Depression of human corticospinal  
55 excitability induced by magnetic theta-burst stimulation: evidence of rapid  
56  
57  
58  
59  
60



- 1  
2  
3 polarity-reversing metaplasticity. *Cerebral Cortex* 2008;**18**:2046–53.  
4 doi:10.1093/cercor/bhm239  
5
- 6  
7 41 Wassermann EM. Risk and safety of repetitive transcranial magnetic stimulation:  
8 report and suggested guidelines from the International Workshop on the Safety of  
9 Repetitive Transcranial Magnetic Stimulation, June 5-7, 1996.  
10 *Electroencephalogr Clin Neurophysiol.* 1998;**108**:1–16.  
11
- 12 42 Rossini PM, Burke D, Chen R, *et al.* Non-invasive electrical and magnetic  
13 stimulation of the brain, spinal cord, roots and peripheral nerves: Basic principles  
14 and procedures for routine clinical and research application. An updated report  
15 from an I.F.C.N. Committee. *Clin Neurophysiol* 2015;**126**:1071–107.  
16 doi:10.1016/j.clinph.2015.02.001  
17
- 18 43 Heller A, Wade DT, Wood VA, *et al.* Arm function after stroke: measurement  
19 and recovery over the first three months. *J Neurol Neurosurg Psychiatr*  
20 1987;**50**:714–9. doi:10.1136/jnnp.50.6.714  
21  
22
- 23 44 Ward NS, Newton JM, Swayne OBC, *et al.* The relationship between brain  
24 activity and peak grip force is modulated by corticospinal system integrity after  
25 subcortical stroke. *Eur J Neurosci* 2007;**25**:1865–73. doi:10.1111/j.1460-  
26 9568.2007.05434.x  
27
- 28 45 Lyle RC. A performance test for assessment of upper limb function in physical  
29 rehabilitation treatment and research. *International Journal of Rehabilitation*  
30 *Research* 1981;**4**:483.  
31  
32
- 33 46 Sullivan KJ, Tilson JK, Cen SY, *et al.* Fugl-Meyer Assessment of Sensorimotor  
34 Function After Stroke: Standardized Training Procedure for Clinical Practice and  
35 Clinical Trials. *Stroke* 2011;**42**:427–32. doi:10.1161/STROKEAHA.110.592766  
36  
37
- 38 47 Rankin J. Cerebral vascular accidents in patients over the age of 60. I. General  
39 considerations. *Scott Med J* 1957;**2**:127–36.  
40
- 41 48 Bembenek JP, Kurczyk K, Karli Nski M, *et al.* The prognostic value of motor-  
42 evoked potentials in motor recovery and functional outcome after stroke – a  
43 systematic review of the literature. *Funct Neurol* 2012;**27**:79–84.  
44
- 45 49 Kwakkel G, Kollen BJ. Predicting activities after stroke: what is clinically  
46 relevant? *Int J Stroke* 2013;**8**:25–32. doi:10.1111/j.1747-4949.2012.00967.x  
47  
48
- 49 50 Gresham GE. Stroke outcome research. *Stroke* 1986;**17**:358–60.  
50
- 51 51 Barros Galvão SC, Borba Costa dos Santos R, Borba dos Santos P, *et al.* Efficacy  
52 of coupling repetitive transcranial magnetic stimulation and physical therapy to  
53 reduce upper-limb spasticity in patients with stroke: a randomized controlled  
54 trial. *Arch Phys Med Rehabil* 2014;**95**:222–9. doi:10.1016/j.apmr.2013.10.023  
55
- 56 52 Rose DK, Patten C, McGuirk TE, *et al.* Does inhibitory repetitive transcranial  
57 magnetic stimulation augment functional task practice to improve arm recovery  
58 in chronic stroke? *Stroke Res Treat* 2014;**2014**:305236. doi:10.1155/2014/305236  
59
- 60 53 Harvey RL, Edwards D, Dunning K, *et al.* Randomized Sham-Controlled Trial of

- 1  
2  
3 Navigated Repetitive Transcranial Magnetic Stimulation for Motor Recovery in  
4 Stroke. *Stroke* 2018;**49**:2138–46. doi:10.1161/STROKEAHA.117.020607  
5
- 6 54 Rehme AK, Fink GR, Cramon von DY, *et al.* The role of the contralesional  
7 motor cortex for motor recovery in the early days after stroke assessed with  
8 longitudinal FMRI. *Cerebral Cortex* 2011;**21**:756–68.  
9 doi:10.1093/cercor/bhq140  
10
- 11 55 Rehme AK, Eickhoff SB, Wang LE, *et al.* Dynamic causal modeling of cortical  
12 activity from the acute to the chronic stage after stroke. *NeuroImage*  
13 2011;**55**:1147–58. doi:10.1016/j.neuroimage.2011.01.014  
14
- 15 56 Koch PJ, Hummel FC. Toward precision medicine: tailoring interventional  
16 strategies based on noninvasive brain stimulation for motor recovery after stroke.  
17 *Current Opinion in Neurology* 2017;**30**:388–97.  
18 doi:10.1097/WCO.0000000000000462  
19
- 20 57 Hesse K, Fulton RL, Abdul-Rahim AH, *et al.* Characteristic adverse events and  
21 their incidence among patients participating in acute ischemic stroke trials. *Stroke*  
22 2014;**45**:2677–82. doi:10.1161/STROKEAHA.114.005845  
23
- 24 58 Johnston KC, Li JY, Lyden PD, *et al.* Medical and neurological complications of  
25 ischemic stroke: experience from the RANTTAS trial. RANTTAS Investigators.  
26 *Stroke* 1998;**29**:447–53.  
27  
28  
29  
30  
31  
32  
33  
34  
35  
36  
37  
38  
39  
40  
41  
42  
43  
44  
45  
46  
47  
48  
49  
50  
51  
52  
53  
54  
55  
56  
57  
58  
59  
60

**Table 1**

| <b>Trial characteristics based on WHO trial registration dataset</b> |                                                                                                                                                                                                                                                                                                                                                                                                                                                                                                                                                                                                                                                                                                                                                                                                                                                              |
|----------------------------------------------------------------------|--------------------------------------------------------------------------------------------------------------------------------------------------------------------------------------------------------------------------------------------------------------------------------------------------------------------------------------------------------------------------------------------------------------------------------------------------------------------------------------------------------------------------------------------------------------------------------------------------------------------------------------------------------------------------------------------------------------------------------------------------------------------------------------------------------------------------------------------------------------|
| <b>Data category</b>                                                 | <b>Trial information</b>                                                                                                                                                                                                                                                                                                                                                                                                                                                                                                                                                                                                                                                                                                                                                                                                                                     |
| Primary registry and trial identifying number                        | German Clinical Trials Register (DRKS)<br>DRKS-ID: DRKS00008963                                                                                                                                                                                                                                                                                                                                                                                                                                                                                                                                                                                                                                                                                                                                                                                              |
| Date of registration in primary registry                             | 16 February 2016                                                                                                                                                                                                                                                                                                                                                                                                                                                                                                                                                                                                                                                                                                                                                                                                                                             |
| Secondary identifying numbers                                        | ClinicalTrials.gov (NCT02910024)                                                                                                                                                                                                                                                                                                                                                                                                                                                                                                                                                                                                                                                                                                                                                                                                                             |
| Source(s) of monetary or material support                            | The study is conducted as an investigator initiated study supported by the Max-Delbrück Prize to GRF and by the University of Cologne Emerging Groups Initiative (CONNECT group; CG and GRF) implemented into the Institutional Strategy of the University of Cologne and the German Excellence Initiative.                                                                                                                                                                                                                                                                                                                                                                                                                                                                                                                                                  |
| Primary sponsor                                                      | University of Cologne, Albertus-Magnus-Platz 50923 Cologne                                                                                                                                                                                                                                                                                                                                                                                                                                                                                                                                                                                                                                                                                                                                                                                                   |
| Secondary sponsor                                                    | NA                                                                                                                                                                                                                                                                                                                                                                                                                                                                                                                                                                                                                                                                                                                                                                                                                                                           |
| Contact for public queries                                           | Prof. Dr. Gereon R. Fink (gereon.fink@uk-koeln.de)                                                                                                                                                                                                                                                                                                                                                                                                                                                                                                                                                                                                                                                                                                                                                                                                           |
| Contact for scientific queries                                       | Prof. Dr. Gereon R. Fink (gereon.fink@uk-koeln.de)                                                                                                                                                                                                                                                                                                                                                                                                                                                                                                                                                                                                                                                                                                                                                                                                           |
| Public title                                                         | Theta-Burst-Stimulation in early Rehabilitation of Stroke                                                                                                                                                                                                                                                                                                                                                                                                                                                                                                                                                                                                                                                                                                                                                                                                    |
| Scientific title                                                     | Theta-Burst-Stimulation in early Rehabilitation of Stroke                                                                                                                                                                                                                                                                                                                                                                                                                                                                                                                                                                                                                                                                                                                                                                                                    |
| Country of recruitment                                               | Germany                                                                                                                                                                                                                                                                                                                                                                                                                                                                                                                                                                                                                                                                                                                                                                                                                                                      |
| Healthy conditions(s) or problems studied                            | Stroke with hemiparesis including impaired hand motor function                                                                                                                                                                                                                                                                                                                                                                                                                                                                                                                                                                                                                                                                                                                                                                                               |
| Interventions                                                        | Active Comparator: Real-rTMS<br>Repetitive transcranial magnetic stimulation (rTMS) of the primary motor cortex in the lesioned hemisphere using the intermittent theta-burst-stimulation protocol (iTBS; application of 3 pulses with a frequency of 50 Hz, in a theta-rhythm of 5 Hz for 2 seconds, repeated every 10 seconds, duration of one session: about 3,5 minutes) before physiotherapy for 8 days<br><br>Sham Comparator: Sham-rTMS<br>Repetitive transcranial magnetic stimulation (rTMS) in sham position (tilted coil over parieto-occipital vertex) before physiotherapy for 8 days                                                                                                                                                                                                                                                           |
| Key inclusion and exclusion criteria                                 | Inclusion Criteria: written consent, age: 40-90 years, ischemic stroke, hemiparesis with impaired hand motor function<br><br>Exclusion Criteria: Subjects who are legally detained in an official institute (§20 MPG), participation in clinical trial within the last 12 weeks, electronic implants or ferromagnetic Implants located in the head, neck or thorax (e.g. clips, intracranial shunt, artificial heart valve, pacemaker), medication pump (e.g. insulin pump), metal splinters in eye or head, pregnancy / breastfeeding, severe neurodegenerative disease, severe neuro-inflammatory disease, history of seizures / epilepsy, physical addiction to alcohol, medication, or drugs (excluded: nicotine), insufficient compliance, present or past malignant tumor involving the central nervous system, severe psychiatric disease, clinically |

|                         |                                                                                                                                                                                                                                                                                                                                                                                                                                                                                                                                                                                                                                                                                                                                                                                                                                                                                                                                                                                                                                                                                                                                                                                                                                                                                                                                                                                                         |
|-------------------------|---------------------------------------------------------------------------------------------------------------------------------------------------------------------------------------------------------------------------------------------------------------------------------------------------------------------------------------------------------------------------------------------------------------------------------------------------------------------------------------------------------------------------------------------------------------------------------------------------------------------------------------------------------------------------------------------------------------------------------------------------------------------------------------------------------------------------------------------------------------------------------------------------------------------------------------------------------------------------------------------------------------------------------------------------------------------------------------------------------------------------------------------------------------------------------------------------------------------------------------------------------------------------------------------------------------------------------------------------------------------------------------------------------|
|                         | manifest bilateral hemiparesis or infarcts in the primary motor cortex or along the corticospinal tract in the hemisphere ipsilateral to the hemiparesis, pre-existing cerebral infarctions with hemiparesis or pre-existing cerebral infarctions in the primary motor cortex or along the corticospinal tract, excluding microvascular changes (e.g. clinically asymptomatic lacunae <1cm), known brain lesion (surgical, traumatic), evidence for enhanced cerebral pressure, severe cardiac dysfunction, life expectancy < 12 months, NIHSS Score > 20, blood glucose imbalances resistant to treatment (<50 mg/dl or >300 mg/dl), elevated blood pressure resistant to treatment (RR > 185/110mmHg), systemic thrombolysis using rt-PA or thrombectomy within the last 24 hours before enrollment in study, medication with benzodiazepines, high-potency antipsychotics or tricyclic antidepressants before hospitalization or long-term during hospitalization                                                                                                                                                                                                                                                                                                                                                                                                                                    |
| Study type              | Interventional<br>Allocation: randomized intervention model.<br>Masking: double blind (subject, caregiver, investigator, outcomes assessor)<br>Assignment: parallel<br>Primary purpose: treatment                                                                                                                                                                                                                                                                                                                                                                                                                                                                                                                                                                                                                                                                                                                                                                                                                                                                                                                                                                                                                                                                                                                                                                                                       |
| Date of first enrolment | April 2016                                                                                                                                                                                                                                                                                                                                                                                                                                                                                                                                                                                                                                                                                                                                                                                                                                                                                                                                                                                                                                                                                                                                                                                                                                                                                                                                                                                              |
| Target sample size      | 150                                                                                                                                                                                                                                                                                                                                                                                                                                                                                                                                                                                                                                                                                                                                                                                                                                                                                                                                                                                                                                                                                                                                                                                                                                                                                                                                                                                                     |
| Recruitment status      | Recruiting                                                                                                                                                                                                                                                                                                                                                                                                                                                                                                                                                                                                                                                                                                                                                                                                                                                                                                                                                                                                                                                                                                                                                                                                                                                                                                                                                                                              |
| Primary outcome(s)      | Relative grip force (time frame: three to six months after enrollment)                                                                                                                                                                                                                                                                                                                                                                                                                                                                                                                                                                                                                                                                                                                                                                                                                                                                                                                                                                                                                                                                                                                                                                                                                                                                                                                                  |
| Key secondary outcomes  | Relative grip force (time frame: after 8 days of intervention, and three to six months after enrollment)<br>Action Research Arm Test (time frame: after 8 days of intervention, and three to six months after enrollment)<br>Fugl-Meyer Motor Scale of the upper extremity (time frame: after 8 days of intervention, and three to six months after enrollment)<br>National Institutes of Health Stroke Scale (time frame: after 8 days of intervention, and three to six months after enrollment)<br>Modified Rankin Scale (time frame: after 8 days of intervention, and three to six months after enrollment)<br>Motor evoked potential induced by stimulation of the affected motor cortex as a measure of motorcortex excitability (time frame: after 8 days of intervention, and three to six months after enrollment)<br>Resting motor threshold as measured by stimulation of the affected motor cortex as a measure of motorcortex excitability (time frame: after 8 days of intervention, and three to six months after enrollment)<br>EuroQol 5D questionnaire (time frame: after 8 days of intervention, and three to six months after enrollment)<br>Barthel-Index at admission and discharge in external rehabilitation facility (time frame: three to six months after enrollment)<br>Days of rehabilitation after intervention phase (time frame: three to six months after enrollment) |

**Table 2**

| Study period                                 | Pre-enrollment | T0 | T1 | T2 | T3 | T4 | T5 | T6 | T7 | T8 | T9 | T10 |
|----------------------------------------------|----------------|----|----|----|----|----|----|----|----|----|----|-----|
| Screening (in-/exclusion criteria)           | X              |    |    |    |    |    |    |    |    |    |    |     |
| Written informed consent                     |                | X  |    |    |    |    |    |    |    |    |    |     |
| Randomization                                |                | X  |    |    |    |    |    |    |    |    |    |     |
| Medical history                              | X              | X  |    |    |    |    |    |    |    |    |    |     |
| Neuroimaging (MRI/CT)                        | X              |    |    |    |    |    |    |    |    |    |    |     |
| TMS-intervention (M1 iTBS/control iTBS)      |                |    | X  | X  | X  | X  | X  | X  | X  | X  |    |     |
| Physiotherapy                                |                |    | X  | X  | X  | X  | X  | X  | X  | X  |    |     |
| Assessment of adverse events                 |                | X  | X  | X  | X  | X  | X  | X  | X  | X  | X  | X   |
| Relative grip strength                       | X              | X  | X  | X  | X  | X  | X  | X  | X  | X  | X  | X   |
| Documentation of medication                  |                | X  | X  | X  | X  | X  | X  | X  | X  | X  | X  | X   |
| Neurological examination                     | X              | X  |    |    |    |    |    |    |    |    | X  | X   |
| Electrophysiological examination (RMT, MEPs) |                | X  |    |    |    |    |    |    |    |    | X  | X   |
| Upper limb motor function (ARAT, FM)         |                | X  |    |    |    |    |    |    |    |    | X  | X   |
| Stroke severity (NIHSS)                      |                | X  |    |    |    |    |    |    |    |    | X  | X   |
| Disability (mRS)                             |                | X  |    |    |    |    |    |    |    |    | X  | X   |
| Quality of life (EQ-5D)                      |                | X  |    |    |    |    |    |    |    |    | X  | X   |
| Assessment of external rehabilitation time   |                |    |    |    |    |    |    |    |    |    |    | X   |

RMT: resting motor threshold; MEPs: Motor evoked potentials; ARAT: Action Research Arm Test; FM: Fugl-Meyer Motor Scale of the upper extremity; NIHSS: National Institutes of Health stroke scale; mRS: modified Rankin Scale; EQ-5D: EuroQol 5D including the visual analogue scale

1  
2  
3  
4  
5  
6  
7  
8  
9  
10  
11  
12  
13  
14  
15  
16  
17  
18  
19  
20  
21  
22  
23  
24  
25  
26  
27  
28  
29  
30  
31  
32  
33  
34  
35  
36  
37  
38  
39  
40  
41  
42  
43  
44  
45  
46  
47  
48  
49  
50  
51  
52  
53  
54  
55  
56  
57  
58  
59  
60

For peer review only

1  
2  
3  
4  
5  
6  
7  
8  
9  
10  
11  
12  
13  
14  
15  
16  
17  
18  
19  
20  
21  
22  
23  
24  
25  
26  
27  
28  
29  
30  
31  
32  
33  
34  
35  
36  
37  
38  
39  
40  
41  
42  
43  
44  
45  
46  
47  
48  
49  
50  
51  
52  
53  
54  
55  
56  
57  
58  
59  
60

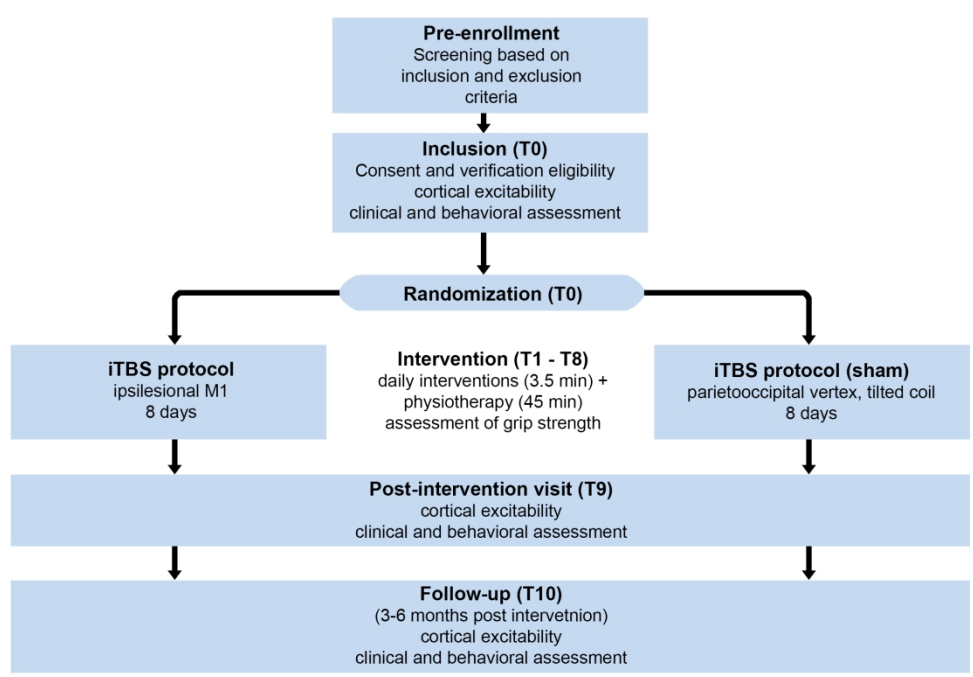

Figure 1. Flow chart of the study procedure

# Reporting checklist for protocol of a clinical trial.

Based on the SPIRIT guidelines.

## Instructions to authors

Complete this checklist by entering the page numbers from your manuscript where readers will find each of the items listed below.

Your article may not currently address all the items on the checklist. Please modify your text to include the missing information. If you are certain that an item does not apply, please write "n/a" and provide a short explanation.

Upload your completed checklist as an extra file when you submit to a journal.

In your methods section, say that you used the SPIRIT reporting guidelines, and cite them as:

Chan A-W, Tetzlaff JM, Altman DG, Laupacis A, Gøtzsche PC, Krleža-Jerić K, Hróbjartsson A, Mann H, Dickersin K, Berlin J, Doré C, Parulekar W, Summerskill W, Groves T, Schulz K, Sox H, Rockhold FW, Rennie D, Moher D. SPIRIT 2013 Statement: Defining standard protocol items for clinical trials. *Ann Intern Med.* 2013;158(3):200-207

|                                             |                     | Reporting Item                                                                                               | Page Number |
|---------------------------------------------|---------------------|--------------------------------------------------------------------------------------------------------------|-------------|
| <b>Administrative information</b>           |                     |                                                                                                              |             |
| Title                                       | <a href="#">#1</a>  | Descriptive title identifying the study design, population, interventions, and, if applicable, trial acronym | 1           |
| Trial registration                          | <a href="#">#2a</a> | Trial identifier and registry name. If not yet registered, name of intended registry                         | 18          |
| Trial registration: data set                | <a href="#">#2b</a> | All items from the World Health Organization Trial Registration Data Set                                     | 24-25       |
| Protocol version                            | <a href="#">#3</a>  | Date and version identifier                                                                                  | 18          |
| Funding                                     | <a href="#">#4</a>  | Sources and types of financial, material, and other support                                                  | 17          |
| Roles and responsibilities: contributorship | <a href="#">#5a</a> | Names, affiliations, and roles of protocol contributors                                                      | 1, 17       |



|    |                           |                     |                                                                      |      |
|----|---------------------------|---------------------|----------------------------------------------------------------------|------|
| 1  | Roles and                 | <a href="#">#5b</a> | Name and contact information for the trial sponsor                   | 18   |
| 2  | responsibilities:         |                     |                                                                      |      |
| 3  | sponsor contact           |                     |                                                                      |      |
| 4  | information               |                     |                                                                      |      |
| 5  |                           |                     |                                                                      |      |
| 6  |                           |                     |                                                                      |      |
| 7  |                           |                     |                                                                      |      |
| 8  | Roles and                 | <a href="#">#5c</a> | Role of study sponsor and funders, if any, in study design;          | n/a  |
| 9  | responsibilities:         |                     | collection, management, analysis, and interpretation of data;        |      |
| 10 | sponsor and funder        |                     | writing of the report; and the decision to submit the report for     |      |
| 11 |                           |                     | publication, including whether they will have ultimate authority     |      |
| 12 |                           |                     | over any of these activities                                         |      |
| 13 |                           |                     |                                                                      |      |
| 14 |                           |                     |                                                                      |      |
| 15 |                           |                     |                                                                      |      |
| 16 | Roles and                 | <a href="#">#5d</a> | Composition, roles, and responsibilities of the coordinating centre, | n/a  |
| 17 | responsibilities:         |                     | steering committee, endpoint adjudication committee, data            |      |
| 18 | committees                |                     | management team, and other individuals or groups overseeing the      |      |
| 19 |                           |                     | trial, if applicable (see Item 21a for data monitoring committee)    |      |
| 20 |                           |                     |                                                                      |      |
| 21 |                           |                     |                                                                      |      |
| 22 |                           |                     |                                                                      |      |
| 23 | <b>Introduction</b>       |                     |                                                                      |      |
| 24 |                           |                     |                                                                      |      |
| 25 | Background and            | <a href="#">#6a</a> | Description of research question and justification for undertaking   | 4-5  |
| 26 | rationale                 |                     | the trial, including summary of relevant studies (published and      |      |
| 27 |                           |                     | unpublished) examining benefits and harms for each intervention      |      |
| 28 |                           |                     |                                                                      |      |
| 29 |                           |                     |                                                                      |      |
| 30 | Background and            | <a href="#">#6b</a> | Explanation for choice of comparators                                | 10   |
| 31 | rationale: choice of      |                     |                                                                      |      |
| 32 | comparators               |                     |                                                                      |      |
| 33 |                           |                     |                                                                      |      |
| 34 |                           |                     |                                                                      |      |
| 35 |                           |                     |                                                                      |      |
| 36 | Objectives                | <a href="#">#7</a>  | Specific objectives or hypotheses                                    | 6-7  |
| 37 |                           |                     |                                                                      |      |
| 38 | Trial design              | <a href="#">#8</a>  | Description of trial design including type of trial (eg, parallel    | 6    |
| 39 |                           |                     | group, crossover, factorial, single group), allocation ratio, and    |      |
| 40 |                           |                     | framework (eg, superiority, equivalence, non-inferiority,            |      |
| 41 |                           |                     | exploratory)                                                         |      |
| 42 |                           |                     |                                                                      |      |
| 43 |                           |                     |                                                                      |      |
| 44 |                           |                     |                                                                      |      |
| 45 | <b>Methods:</b>           |                     |                                                                      |      |
| 46 | <b>Participants,</b>      |                     |                                                                      |      |
| 47 | <b>interventions, and</b> |                     |                                                                      |      |
| 48 | <b>outcomes</b>           |                     |                                                                      |      |
| 49 |                           |                     |                                                                      |      |
| 50 |                           |                     |                                                                      |      |
| 51 | Study setting             | <a href="#">#9</a>  | Description of study settings (eg, community clinic, academic        | 7    |
| 52 |                           |                     | hospital) and list of countries where data will be collected.        |      |
| 53 |                           |                     | Reference to where list of study sites can be obtained               |      |
| 54 |                           |                     |                                                                      |      |
| 55 |                           |                     |                                                                      |      |
| 56 |                           |                     |                                                                      |      |
| 57 | Eligibility criteria      | <a href="#">#10</a> | Inclusion and exclusion criteria for participants. If applicable,    | 8-10 |
| 58 |                           |                     | eligibility criteria for study centres and individuals who will      |      |
| 59 |                           |                     |                                                                      |      |
| 60 |                           |                     |                                                                      |      |

|    |                              |                                                                                            |       |
|----|------------------------------|--------------------------------------------------------------------------------------------|-------|
|    |                              | perform the interventions (eg, surgeons, psychotherapists)                                 |       |
| 1  |                              |                                                                                            |       |
| 2  | Interventions:               | <a href="#">#11a</a> Interventions for each group with sufficient detail to allow          | 8     |
| 3  | description                  | replication, including how and when they will be administered                              |       |
| 4  |                              |                                                                                            |       |
| 5  | Interventions:               | <a href="#">#11b</a> Criteria for discontinuing or modifying allocated interventions for a | 8     |
| 6  | modifications                | given trial participant (eg, drug dose change in response to harms,                        |       |
| 7  |                              | participant request, or improving / worsening disease)                                     |       |
| 8  |                              |                                                                                            |       |
| 9  | Interventions:               | <a href="#">#11c</a> Strategies to improve adherence to intervention protocols, and any    | 13-14 |
| 10 | adherence                    | procedures for monitoring adherence (eg, drug tablet return;                               |       |
| 11 |                              | laboratory tests)                                                                          |       |
| 12 | Interventions:               | <a href="#">#11d</a> Relevant concomitant care and interventions that are permitted or     | 7     |
| 13 | concomitant care             | prohibited during the trial                                                                |       |
| 14 |                              |                                                                                            |       |
| 15 | Outcomes                     | <a href="#">#12</a> Primary, secondary, and other outcomes, including the specific         | 10    |
| 16 |                              | measurement variable (eg, systolic blood pressure), analysis metric                        |       |
| 17 |                              | (eg, change from baseline, final value, time to event), method of                          |       |
| 18 |                              | aggregation (eg, median, proportion), and time point for each                              |       |
| 19 |                              | outcome. Explanation of the clinical relevance of chosen efficacy                          |       |
| 20 |                              | and harm outcomes is strongly recommended                                                  |       |
| 21 | Participant timeline         | <a href="#">#13</a> Time schedule of enrolment, interventions (including any run-ins       | 26    |
| 22 |                              | and washouts), assessments, and visits for participants. A                                 |       |
| 23 |                              | schematic diagram is highly recommended (see Figure)                                       |       |
| 24 |                              |                                                                                            |       |
| 25 | Sample size                  | <a href="#">#14</a> Estimated number of participants needed to achieve study               | 11    |
| 26 |                              | objectives and how it was determined, including clinical and                               |       |
| 27 |                              | statistical assumptions supporting any sample size calculations                            |       |
| 28 |                              |                                                                                            |       |
| 29 | Recruitment                  | <a href="#">#15</a> Strategies for achieving adequate participant enrolment to reach       | 7     |
| 30 |                              | target sample size                                                                         |       |
| 31 |                              |                                                                                            |       |
| 32 |                              |                                                                                            |       |
| 33 |                              |                                                                                            |       |
| 34 |                              |                                                                                            |       |
| 35 |                              |                                                                                            |       |
| 36 |                              |                                                                                            |       |
| 37 |                              |                                                                                            |       |
| 38 |                              |                                                                                            |       |
| 39 |                              |                                                                                            |       |
| 40 |                              |                                                                                            |       |
| 41 |                              |                                                                                            |       |
| 42 |                              |                                                                                            |       |
| 43 |                              |                                                                                            |       |
| 44 |                              |                                                                                            |       |
| 45 | <b>Methods: Assignment</b>   |                                                                                            |       |
| 46 | <b>of interventions (for</b> |                                                                                            |       |
| 47 | <b>controlled trials)</b>    |                                                                                            |       |
| 48 |                              |                                                                                            |       |
| 49 |                              |                                                                                            |       |
| 50 | Allocation: sequence         | <a href="#">#16a</a> Method of generating the allocation sequence (eg, computer-           | 11    |
| 51 | generation                   | generated random numbers), and list of any factors for                                     |       |
| 52 |                              | stratification. To reduce predictability of a random sequence,                             |       |
| 53 |                              | details of any planned restriction (eg, blocking) should be provided                       |       |
| 54 |                              | in a separate document that is unavailable to those who enrol                              |       |
| 55 |                              | participants or assign interventions                                                       |       |
| 56 |                              |                                                                                            |       |
| 57 |                              |                                                                                            |       |
| 58 |                              |                                                                                            |       |
| 59 |                              |                                                                                            |       |
| 60 |                              |                                                                                            |       |

|    |                        |                      |                                                                       |       |
|----|------------------------|----------------------|-----------------------------------------------------------------------|-------|
| 1  | Allocation concealment | <a href="#">#16b</a> | Mechanism of implementing the allocation sequence (eg, central        | 11    |
| 2  | mechanism              |                      | telephone; sequentially numbered, opaque, sealed envelopes),          |       |
| 3  |                        |                      | describing any steps to conceal the sequence until interventions are  |       |
| 4  |                        |                      | assigned                                                              |       |
| 5  |                        |                      |                                                                       |       |
| 6  |                        |                      |                                                                       |       |
| 7  |                        |                      |                                                                       |       |
| 8  | Allocation:            | <a href="#">#16c</a> | Who will generate the allocation sequence, who will enrol             | 11    |
| 9  | implementation         |                      | participants, and who will assign participants to interventions       |       |
| 10 |                        |                      |                                                                       |       |
| 11 | Blinding (masking)     | <a href="#">#17a</a> | Who will be blinded after assignment to interventions (eg, trial      | 12    |
| 12 |                        |                      | participants, care providers, outcome assessors, data analysts), and  |       |
| 13 |                        |                      | how                                                                   |       |
| 14 |                        |                      |                                                                       |       |
| 15 |                        |                      |                                                                       |       |
| 16 |                        |                      |                                                                       |       |
| 17 | Blinding (masking):    | <a href="#">#17b</a> | If blinded, circumstances under which unblinding is permissible,      | 12    |
| 18 | emergency unblinding   |                      | and procedure for revealing a participant's allocated intervention    |       |
| 19 |                        |                      | during the trial                                                      |       |
| 20 |                        |                      |                                                                       |       |
| 21 |                        |                      |                                                                       |       |
| 22 | <b>Methods: Data</b>   |                      |                                                                       |       |
| 23 | <b>collection,</b>     |                      |                                                                       |       |
| 24 | <b>management, and</b> |                      |                                                                       |       |
| 25 | <b>analysis</b>        |                      |                                                                       |       |
| 26 |                        |                      |                                                                       |       |
| 27 |                        |                      |                                                                       |       |
| 28 |                        |                      |                                                                       |       |
| 29 | Data collection plan   | <a href="#">#18a</a> | Plans for assessment and collection of outcome, baseline, and other   | 13    |
| 30 |                        |                      | trial data, including any related processes to promote data quality   |       |
| 31 |                        |                      | (eg, duplicate measurements, training of assessors) and a             |       |
| 32 |                        |                      | description of study instruments (eg, questionnaires, laboratory      |       |
| 33 |                        |                      | tests) along with their reliability and validity, if known. Reference |       |
| 34 |                        |                      | to where data collection forms can be found, if not in the protocol   |       |
| 35 |                        |                      |                                                                       |       |
| 36 |                        |                      |                                                                       |       |
| 37 |                        |                      |                                                                       |       |
| 38 |                        |                      |                                                                       |       |
| 39 | Data collection plan:  | <a href="#">#18b</a> | Plans to promote participant retention and complete follow-up,        | 14    |
| 40 | retention              |                      | including list of any outcome data to be collected for participants   |       |
| 41 |                        |                      | who discontinue or deviate from intervention protocols                |       |
| 42 |                        |                      |                                                                       |       |
| 43 |                        |                      |                                                                       |       |
| 44 | Data management        | <a href="#">#19</a>  | Plans for data entry, coding, security, and storage, including any    | 13-14 |
| 45 |                        |                      | related processes to promote data quality (eg, double data entry;     |       |
| 46 |                        |                      | range checks for data values). Reference to where details of data     |       |
| 47 |                        |                      | management procedures can be found, if not in the protocol            |       |
| 48 |                        |                      |                                                                       |       |
| 49 |                        |                      |                                                                       |       |
| 50 |                        |                      |                                                                       |       |
| 51 | Statistics: outcomes   | <a href="#">#20a</a> | Statistical methods for analysing primary and secondary outcomes.     | 11-12 |
| 52 |                        |                      | Reference to where other details of the statistical analysis plan can |       |
| 53 |                        |                      | be found, if not in the protocol                                      |       |
| 54 |                        |                      |                                                                       |       |
| 55 |                        |                      |                                                                       |       |
| 56 | Statistics: additional | <a href="#">#20b</a> | Methods for any additional analyses (eg, subgroup and adjusted        | 11-12 |
| 57 | analyses               |                      | analyses)                                                             |       |
| 58 |                        |                      |                                                                       |       |
| 59 |                        |                      |                                                                       |       |
| 60 |                        |                      |                                                                       |       |

|    |                            |                      |                                                                         |       |
|----|----------------------------|----------------------|-------------------------------------------------------------------------|-------|
| 1  | Statistics: analysis       | <a href="#">#20c</a> | Definition of analysis population relating to protocol non-             | 11-12 |
| 2  | population and missing     |                      | adherence (eg, as randomised analysis), and any statistical methods     |       |
| 3  | data                       |                      | to handle missing data (eg, multiple imputation)                        |       |
| 4  |                            |                      |                                                                         |       |
| 5  |                            |                      |                                                                         |       |
| 6  | <b>Methods: Monitoring</b> |                      |                                                                         |       |
| 7  |                            |                      |                                                                         |       |
| 8  | Data monitoring:           | <a href="#">#21a</a> | Composition of data monitoring committee (DMC); summary of its          | n/a   |
| 9  | formal committee           |                      | role and reporting structure; statement of whether it is independent    |       |
| 10 |                            |                      | from the sponsor and competing interests; and reference to where        |       |
| 11 |                            |                      | further details about its charter can be found, if not in the protocol. |       |
| 12 |                            |                      | Alternatively, an explanation of why a DMC is not needed                |       |
| 13 |                            |                      |                                                                         |       |
| 14 |                            |                      |                                                                         |       |
| 15 |                            |                      |                                                                         |       |
| 16 |                            |                      |                                                                         |       |
| 17 | Data monitoring:           | <a href="#">#21b</a> | Description of any interim analyses and stopping guidelines,            | n/a   |
| 18 | interim analysis           |                      | including who will have access to these interim results and make        |       |
| 19 |                            |                      | the final decision to terminate the trial                               |       |
| 20 |                            |                      |                                                                         |       |
| 21 |                            |                      |                                                                         |       |
| 22 | Harms                      | <a href="#">#22</a>  | Plans for collecting, assessing, reporting, and managing solicited      | 13    |
| 23 |                            |                      | and spontaneously reported adverse events and other unintended          |       |
| 24 |                            |                      | effects of trial interventions or trial conduct                         |       |
| 25 |                            |                      |                                                                         |       |
| 26 |                            |                      |                                                                         |       |
| 27 | Auditing                   | <a href="#">#23</a>  | Frequency and procedures for auditing trial conduct, if any, and        | 13    |
| 28 |                            |                      | whether the process will be independent from investigators and the      |       |
| 29 |                            |                      | sponsor                                                                 |       |
| 30 |                            |                      |                                                                         |       |
| 31 |                            |                      |                                                                         |       |
| 32 |                            |                      |                                                                         |       |
| 33 | <b>Ethics and</b>          |                      |                                                                         |       |
| 34 | <b>dissemination</b>       |                      |                                                                         |       |
| 35 |                            |                      |                                                                         |       |
| 36 | Research ethics            | <a href="#">#24</a>  | Plans for seeking research ethics committee / institutional review      | 18    |
| 37 | approval                   |                      | board (REC / IRB) approval                                              |       |
| 38 |                            |                      |                                                                         |       |
| 39 |                            |                      |                                                                         |       |
| 40 | Protocol amendments        | <a href="#">#25</a>  | Plans for communicating important protocol modifications (eg,           | 18    |
| 41 |                            |                      | changes to eligibility criteria, outcomes, analyses) to relevant        |       |
| 42 |                            |                      | parties (eg, investigators, REC / IRBs, trial participants, trial       |       |
| 43 |                            |                      | registries, journals, regulators)                                       |       |
| 44 |                            |                      |                                                                         |       |
| 45 |                            |                      |                                                                         |       |
| 46 |                            |                      |                                                                         |       |
| 47 | Consent or assent          | <a href="#">#26a</a> | Who will obtain informed consent or assent from potential trial         | 7     |
| 48 |                            |                      | participants or authorised surrogates, and how (see Item 32)            |       |
| 49 |                            |                      |                                                                         |       |
| 50 |                            |                      |                                                                         |       |
| 51 | Consent or assent:         | <a href="#">#26b</a> | Additional consent provisions for collection and use of participant     | n/a   |
| 52 | ancillary studies          |                      | data and biological specimens in ancillary studies, if applicable       |       |
| 53 |                            |                      |                                                                         |       |
| 54 |                            |                      |                                                                         |       |
| 55 | Confidentiality            | <a href="#">#27</a>  | How personal information about potential and enrolled participants      | 13-14 |
| 56 |                            |                      | will be collected, shared, and maintained in order to protect           |       |
| 57 |                            |                      | confidentiality before, during, and after the trial                     |       |
| 58 |                            |                      |                                                                         |       |
| 59 |                            |                      |                                                                         |       |
| 60 |                            |                      |                                                                         |       |

|    |                                             |                      |                                                                                                                                                                                                                                                                                     |     |
|----|---------------------------------------------|----------------------|-------------------------------------------------------------------------------------------------------------------------------------------------------------------------------------------------------------------------------------------------------------------------------------|-----|
| 1  | Declaration of interests                    | <a href="#">#28</a>  | Financial and other competing interests for principal investigators for the overall trial and each study site                                                                                                                                                                       | 18  |
| 2  |                                             |                      |                                                                                                                                                                                                                                                                                     |     |
| 3  |                                             |                      |                                                                                                                                                                                                                                                                                     |     |
| 4  |                                             |                      |                                                                                                                                                                                                                                                                                     |     |
| 5  | Data access                                 | <a href="#">#29</a>  | Statement of who will have access to the final trial dataset, and disclosure of contractual agreements that limit such access for investigators                                                                                                                                     | 14  |
| 6  |                                             |                      |                                                                                                                                                                                                                                                                                     |     |
| 7  |                                             |                      |                                                                                                                                                                                                                                                                                     |     |
| 8  |                                             |                      |                                                                                                                                                                                                                                                                                     |     |
| 9  |                                             |                      |                                                                                                                                                                                                                                                                                     |     |
| 10 | Ancillary and post trial care               | <a href="#">#30</a>  | Provisions, if any, for ancillary and post-trial care, and for compensation to those who suffer harm from trial participation                                                                                                                                                       | n/a |
| 11 |                                             |                      |                                                                                                                                                                                                                                                                                     |     |
| 12 |                                             |                      |                                                                                                                                                                                                                                                                                     |     |
| 13 |                                             |                      |                                                                                                                                                                                                                                                                                     |     |
| 14 | Dissemination policy: trial results         | <a href="#">#31a</a> | Plans for investigators and sponsor to communicate trial results to participants, healthcare professionals, the public, and other relevant groups (eg, via publication, reporting in results databases, or other data sharing arrangements), including any publication restrictions | 2   |
| 15 |                                             |                      |                                                                                                                                                                                                                                                                                     |     |
| 16 |                                             |                      |                                                                                                                                                                                                                                                                                     |     |
| 17 |                                             |                      |                                                                                                                                                                                                                                                                                     |     |
| 18 |                                             |                      |                                                                                                                                                                                                                                                                                     |     |
| 19 |                                             |                      |                                                                                                                                                                                                                                                                                     |     |
| 20 |                                             |                      |                                                                                                                                                                                                                                                                                     |     |
| 21 | Dissemination policy: authorship            | <a href="#">#31b</a> | Authorship eligibility guidelines and any intended use of professional writers                                                                                                                                                                                                      | 17  |
| 22 |                                             |                      |                                                                                                                                                                                                                                                                                     |     |
| 23 |                                             |                      |                                                                                                                                                                                                                                                                                     |     |
| 24 |                                             |                      |                                                                                                                                                                                                                                                                                     |     |
| 25 | Dissemination policy: reproducible research | <a href="#">#31c</a> | Plans, if any, for granting public access to the full protocol, participant-level dataset, and statistical code                                                                                                                                                                     | n/a |
| 26 |                                             |                      |                                                                                                                                                                                                                                                                                     |     |
| 27 |                                             |                      |                                                                                                                                                                                                                                                                                     |     |
| 28 | <b>Appendices</b>                           |                      |                                                                                                                                                                                                                                                                                     |     |
| 29 |                                             |                      |                                                                                                                                                                                                                                                                                     |     |
| 30 |                                             |                      |                                                                                                                                                                                                                                                                                     |     |
| 31 | Informed consent materials                  | <a href="#">#32</a>  | Model consent form and other related documentation given to participants and authorised surrogates                                                                                                                                                                                  | n/a |
| 32 |                                             |                      |                                                                                                                                                                                                                                                                                     |     |
| 33 |                                             |                      |                                                                                                                                                                                                                                                                                     |     |
| 34 |                                             |                      |                                                                                                                                                                                                                                                                                     |     |
| 35 | Biological specimens                        | <a href="#">#33</a>  | Plans for collection, laboratory evaluation, and storage of biological specimens for genetic or molecular analysis in the current trial and for future use in ancillary studies, if applicable                                                                                      | n/a |
| 36 |                                             |                      |                                                                                                                                                                                                                                                                                     |     |
| 37 |                                             |                      |                                                                                                                                                                                                                                                                                     |     |
| 38 |                                             |                      |                                                                                                                                                                                                                                                                                     |     |
| 39 |                                             |                      |                                                                                                                                                                                                                                                                                     |     |

40 The SPIRIT checklist is distributed under the terms of the Creative Commons Attribution License CC-BY-ND  
 41 3.0. This checklist was completed on 03. September 2019 using <https://www.goodreports.org/>, a tool made by  
 42 the [EQUATOR Network](#) in collaboration with [Penelope.ai](#)  
 43  
 44  
 45  
 46  
 47  
 48  
 49  
 50  
 51  
 52  
 53  
 54  
 55  
 56  
 57  
 58  
 59

# BMJ Open

## Intermittent Theta Burst Stimulation applied during early rehabilitation after stroke: Study protocol for a randomized controlled trial

|                                 |                                                                                                                                                                                                                                                                                                                                                                                                                                                                                                                                                                                                                                                                                                                                                                                                                                                                                                                                                                                                                                                                                                                                                                                                                                                                   |
|---------------------------------|-------------------------------------------------------------------------------------------------------------------------------------------------------------------------------------------------------------------------------------------------------------------------------------------------------------------------------------------------------------------------------------------------------------------------------------------------------------------------------------------------------------------------------------------------------------------------------------------------------------------------------------------------------------------------------------------------------------------------------------------------------------------------------------------------------------------------------------------------------------------------------------------------------------------------------------------------------------------------------------------------------------------------------------------------------------------------------------------------------------------------------------------------------------------------------------------------------------------------------------------------------------------|
| Journal:                        | <i>BMJ Open</i>                                                                                                                                                                                                                                                                                                                                                                                                                                                                                                                                                                                                                                                                                                                                                                                                                                                                                                                                                                                                                                                                                                                                                                                                                                                   |
| Manuscript ID                   | bmjopen-2019-034088.R1                                                                                                                                                                                                                                                                                                                                                                                                                                                                                                                                                                                                                                                                                                                                                                                                                                                                                                                                                                                                                                                                                                                                                                                                                                            |
| Article Type:                   | Protocol                                                                                                                                                                                                                                                                                                                                                                                                                                                                                                                                                                                                                                                                                                                                                                                                                                                                                                                                                                                                                                                                                                                                                                                                                                                          |
| Date Submitted by the Author:   | 04-Dec-2019                                                                                                                                                                                                                                                                                                                                                                                                                                                                                                                                                                                                                                                                                                                                                                                                                                                                                                                                                                                                                                                                                                                                                                                                                                                       |
| Complete List of Authors:       | Hensel, Lukas; Faculty of Medicine and University Hospital Cologne, University of Cologne, Department of Neurology<br>Grefkes, Christian; Faculty of Medicine and University Hospital Cologne, University of Cologne, Department of Neurology; Research Centre Jülich, Cognitive Neuroscience, Institute of Neuroscience and Medicine (INM-3)<br>Tscherpel, Caroline; Faculty of Medicine and University Hospital Cologne, University of Cologne, Department of Neurology; Research Centre Jülich, Cognitive Neuroscience, Institute of Neuroscience and Medicine (INM-3)<br>Ringmaier, Corinna; Faculty of Medicine and University Hospital Cologne, University of Cologne, Department of Neurology<br>Kraus, Daria; Clinical Trials Center Cologne (CTCC)<br>Hamacher, Stefanie; Faculty of Medicine and University Hospital Cologne, University of Cologne, Institute of Medical Statistics and Computational Biology<br>Volz, Lukas; Faculty of Medicine and University Hospital Cologne, University of Cologne, Department of Neurology<br>Fink, Gereon; Faculty of Medicine and University Hospital Cologne, University of Cologne, Department of Neurology; Research Centre Jülich, Cognitive Neuroscience, Institute of Neuroscience and Medicine (INM-3) |
| <b>Primary Subject Heading</b>: | Neurology                                                                                                                                                                                                                                                                                                                                                                                                                                                                                                                                                                                                                                                                                                                                                                                                                                                                                                                                                                                                                                                                                                                                                                                                                                                         |
| Secondary Subject Heading:      | Rehabilitation medicine                                                                                                                                                                                                                                                                                                                                                                                                                                                                                                                                                                                                                                                                                                                                                                                                                                                                                                                                                                                                                                                                                                                                                                                                                                           |
| Keywords:                       | rehabilitation, hemiparesis, iTBS, TMS, motor recovery                                                                                                                                                                                                                                                                                                                                                                                                                                                                                                                                                                                                                                                                                                                                                                                                                                                                                                                                                                                                                                                                                                                                                                                                            |
|                                 |                                                                                                                                                                                                                                                                                                                                                                                                                                                                                                                                                                                                                                                                                                                                                                                                                                                                                                                                                                                                                                                                                                                                                                                                                                                                   |

SCHOLARONE™  
Manuscripts

1  
2  
3 **Intermittent Theta Burst Stimulation applied during early**  
4  
5 **rehabilitation after stroke: Study protocol for a randomized**  
6  
7 **controlled trial**  
8  
9

10  
11  
12 Lukas Hensel\*<sup>1</sup>, Christian Grefkes\*<sup>1, 2</sup>, Caroline Tscherpel<sup>1, 2</sup>, Corinna Ringmaier<sup>1</sup>, Daria  
13 Kraus<sup>3</sup>, Stefanie Hamacher<sup>4</sup>, Lukas J. Volz<sup>1</sup>, Gereon R. Fink<sup>1, 2</sup>  
14

15 <sup>1</sup> *Department of Neurology, Faculty of Medicine and University Hospital Cologne, University of Cologne, Cologne,*  
16 *Germany*

17  
18 <sup>2</sup> *Cognitive Neuroscience, Institute of Neuroscience and Medicine (INM-3), Research Centre Jülich, Jülich,*  
19 *Germany*

20  
21 <sup>3</sup> *Clinical Trials Center Cologne (CTCC), Cologne, Germany.*

22  
23 <sup>4</sup> *Institute of Medical Statistics and Computational Biology, Faculty of Medicine and University Hospital Cologne,*  
24 *University of Cologne, Cologne, Germany*

25  
26  
27 \*Shared First-Authorship  
28  
29  
30  
31  
32  
33  
34  
35  
36  
37  
38  
39  
40  
41  
42  
43  
44  
45  
46  
47  
48  
49  
50  
51  
52  
53  
54  
55  
56  
57  
58  
59  
60

Word count: 3803

Running title: iTBS in early stroke rehabilitation

Correspondence should be addressed to:

Prof. Dr. Gereon R. Fink

Institute of Neuroscience and Medicine (INM-3),

Forschungszentrum Jülich,

52425 Jülich, Germany

Email: g.r.fink@fz-juelich.de

## Abstract

**Introduction:** Intermittent theta burst stimulation (iTBS) applied to primary motor cortex (M1) has been shown to modulate both the excitability and connectivity of the motor system. A recent proof-of-principle study, based on a small group of hospitalized stroke patients due to acute cerebral ischemia, suggested that adding iTBS (applied over the ipsilesional M1) to physiotherapy early after stroke for five consecutive days can amplify motor recovery with lasting after-effects. A randomized controlled clinical trial using a double-blind design is warranted to justify the implementation of iTBS-assisted motor rehabilitation in the neurorehabilitation from an acute ischemic stroke.

**Methods/design:** We investigate the effects of daily iTBS on early motor rehabilitation after stroke in an investigator-initiated, longitudinal randomized controlled trial. Patients (n=150) with hemiparesis receive iTBS (600 pulses) applied to the ipsilesional motor cortex (M1) or a control stimulation (i.e., coil placement over parieto-occipital vertex in parallel to the interhemispheric fissure and with a tilt of 45°). On eight consecutive workdays, a 45 min arm-centered motor training follows the intervention. The relative grip strength defined as the grip force ratios of the affected and unaffected hand serves as the primary outcome parameter. Secondary outcome parameters are measures of arm function (Action Research Arm Test, Fugl-Meyer Motor Scale), stroke severity (National Institutes of Health stroke scale), stroke-induced disability (modified Rankin Scale, Barthel Index), duration of inpatient rehabilitation, quality of life (EuroQol 5D), motor evoked potentials (MEP), and the resting motor threshold (RMT) of the ipsilesional M1.

**Ethics and dissemination:** The study was approved by the Ethics Commission of the Medical Faculty, University of Cologne, Germany (reference number 15-343). Data will be disseminated through peer-reviewed publications and presentations at conferences.

**Keywords:** rehabilitation, hemiparesis, iTBS, TMS, motor recovery



## Article Summary

### *Strengths and limitations of this study*

- The present study is a randomized, controlled, double-blind, single-center trial assessing the efficacy of iTBS in patients with acute cerebral ischemia.
- Interventions are applied before daily physiotherapy in the first few days after stroke since previous work suggests higher neural plasticity during the acute, compared to the chronic phase.
- Patients receive iTBS during their hospitalization warranting the adequate assessment of adverse events.
- A limitation of the study is a potential selection bias, given the patients' expected comorbidities, which may pose a risk for the application of repetitive transcranial magnetic stimulation or compromise the ability to provide informed consent.

## Introduction

Stroke is a leading cause of acquired long-term disability in adults worldwide. From 1990 to 2010, the prevalence of stroke has reached numbers of 500-1000 per 100 000 people in North America and European countries [1]. Although recent developments in the acute treatment of a stroke such as, e.g., thrombolysis or thrombectomy, effectively reduce both morbidity and mortality after a stroke [2], the majority of patients is still left with permanent motor deficits. More than 50% of stroke survivors develop a persisting impairment, affecting the patients' activities of daily living [3,4].

Functional recovery has been shown to arise, at least in part, from the reorganization of functional brain networks, with intact neural structures compensating the loss of specialized neural circuitry damaged by the lesion [5,6]. Importantly, a focal brain lesion as induced by a stroke also interferes with the neural processing in distant brain regions, thereby affecting the brain at a network level. In this context, neuroimaging studies have frequently reported altered brain activity in motor-related cortical areas of both hemispheres, even for lesions affecting primarily deep white matter [7-9]. Longitudinal data revealed that in the first days after stroke, the activity of primary motor cortex is typically decreased, particularly in patients with severe motor deficits despite structurally intact motor cortex [8]. This pattern is typically followed by a bihemispheric increase of activity, which correlates with the amount of early motor recovery. However, best predictors for functional motor recovery are high levels of activity in the ipsilesional motor cortex as well as an activity pattern lateralized to the ipsilesional hemisphere [10,11]. Thus, restoring neural activation, particularly in the lesioned hemisphere, seems to be essential for functional recovery after stroke.

Comparable effects have been found for changes of motor-cortical excitability as probed by transcranial magnetic stimulation (TMS) [12]. In parallel to the initial decrease of neural activation observed in the ipsilesional M1 [8], TMS studies have also found lower excitability of this region, which correlated with the severity and prognosis of motor deficits [13,14].

1  
2  
3 To date, first-line rehabilitative strategies of improving motor deficits are based on functional  
4 training, i.e., physical or occupational therapy early after stroke [15,16]. Such behavioral  
5 interventions have been demonstrated to facilitate neural reorganization [17]. Accumulating  
6 evidence suggests that non-invasive brain stimulation techniques such as repetitive TMS  
7 (rTMS) may enhance neuroplasticity, thereby facilitating neural reorganization and recovery  
8 from stroke deficits [18,19]. Particularly the observation of decreased ipsilesional excitability  
9 early after stroke has led to the hypothesis that rTMS may be capable of increasing excitability  
10 and thus aiding functional recovery [20]. This effect has been demonstrated for different rTMS  
11 protocols varying in stimulation frequency, pattern, and the number of pulses [21,22]. Of note,  
12 rTMS may not only aid neural reorganization within the stimulated region but also modulates  
13 the activity of interconnected brain regions, e.g., the dorsal premotor cortex or the  
14 supplementary motor area, as shown for both healthy subjects [23] and stroke patients [24].  
15 Thus, rTMS applied to M1 likely results in a system-wide change of neural activity in both  
16 hemispheres. At the behavioral level, proof-of-principle studies indicate that a single session  
17 of rTMS applied to ipsilesional M1 may transiently improve motor function of the paretic hand  
18 [25,26]. Further, a critical factor for a therapeutic effect seems to be the combination of  
19 plasticity-enhancing interventions with motor training, possibly leading to a better consolidation  
20 of (re-)learned motor skills [27-29].

21  
22  
23 While several rTMS studies in stroke patients reported transient improvements in motor  
24 function, other studies failed to demonstrate lasting beneficial effects [30-33]. A recently  
25 published large sample (n=167) trial (NICHE trial) revealed that application of inhibitory rTMS  
26 over contralesional M1 in chronic stroke patients failed to demonstrate a beneficial effect of  
27 contralesional 1 Hz stimulation paired with arm motor training in chronic stroke patients [34]  
28 despite promising data from a relatively large number of pilot studies with small sample sizes  
29 (usually 10-20 patients). One likely reason may be the time window of intervention, which, in  
30 most studies, targeted the chronic phase after stroke. Substantial functional recovery  
31 alongside high levels of neural plasticity is observed in the acute and subacute phase after  
32 stroke [35].

1  
2  
3 In contrast, the effectiveness of behavioral interventions gets more and more limited the more  
4 time elapsed since the onset of the stroke. This negative effect may also be true for rTMS-  
5 mediated excitatory effects and its potential to support the recovery of function and  
6 neurorehabilitation. Hence, the amplification of neuroplasticity using rTMS may be most  
7 effective during the acute and early subacute phase after a stroke. While data on  
8 neuromodulatory effects within the first few days and weeks after stroke remain scarce, recent  
9 evidence from our group has indicated lasting beneficial effects of rTMS on motor recovery in  
10 a sample of stroke patients in the first few days after stroke [24]. In this study, two groups of  
11 early subacute stroke patients (each n=13, on average seven days post-stroke) received  
12 intermittent theta burst stimulation (iTBS, 600 pulses, 70% RMT) for five days either covering  
13 ipsilesional M1 or a control with the TMS coil tilted over the parieto-occipital vertex. Recovery  
14 of grip strength as measured by the relative grip strength was stronger in the M1-stimulated  
15 group than in the control-stimulated group, with the beneficial effect persisting at least three to  
16 six months. As shown by fMRI before and after the rTMS intervention, patients in the verum  
17 rTMS group showed increased functional connectivity between the modulated stimulation site  
18 and a functionally related motor network, including the dorsal premotor cortex and the  
19 supplementary motor area, compared with patients in the control stimulation group [24]. Given  
20 that without rTMS intervention patients during the first few days after stroke feature a loss of  
21 activity and connectivity in the ipsilesional hemisphere [36,37,38], the finding of increased  
22 connectivity with the verum stimulation site suggests that the beneficial effects of rTMS may  
23 not only result from inducing plasticity locally in M1, but also from enhancing connectivity with  
24 a functionally related motor network. Taken together, these findings support the hypothesis  
25 that rTMS may be applied in addition to physiotherapy to induce plasticity in the ipsilesional  
26 M1 and thereby promote motor outcome. Of note, the small sample size of the follow-up groups  
27 and the heterogeneity of post-interventional treatments across patients preclude a reliable  
28 estimation of the clinical utility of combined iTBS and physiotherapy in (sub-)acute stroke  
29 patients to date. While studies with similarly small sample sizes corroborate a positive effect  
30 of M1-modulation by non-invasive brain stimulation after stroke [31], large RCTs are widely

1  
2  
3 lacking.  
4  
5  
6  
7  
8

## 9 **Aims and hypotheses**

10  
11  
12 Accordingly, this study aims to investigate the efficacy of combining iTBS over the ipsilesional  
13 M1 (real) versus iTBS over a parieto-occipital control site, priming physiotherapy in the early  
14 rehabilitation of stroke patients suffering from impaired hand motor function. Thereby, the main  
15 goal of our study is to demonstrate the effectiveness of iTBS in supporting the recovery of  
16 motor function in a sufficiently powered sample, expecting stronger rehabilitation effects on  
17 relative grip strength (primary outcome parameter) in the M1-iTBS group compared to the  
18 control-stimulation treated group. Furthermore, by assessing secondary outcome parameters  
19 (ARAT, Fugl-Meyer assessment), we also test whether combining iTBS with physiotherapy  
20 during early rehabilitation may influence more complex motor functions of the impaired upper  
21 extremity. This study will be the first with a large sample of early subacute stroke patients  
22 (n=150), systematically assessing clinical deficits, electrophysiological data, structural images,  
23 comorbidity, and medication before, during, and at least three months after the application of  
24 iTBS. We hypothesize that the combination of physical training with iTBS over ipsilesional M1  
25 significantly enhances motor recovery after stroke compared to physical training combined  
26 with control stimulation.  
27  
28  
29  
30  
31  
32  
33  
34  
35  
36  
37  
38  
39  
40  
41  
42  
43  
44  
45  
46  
47

## 48 **Methods**

### 49 *Study design, recruitment, and procedure*

50  
51  
52 This prospective, randomized, controlled, double-blind, single-center trial is conducted at the  
53 Department of Neurology University Hospital Cologne, Germany. Hospitalized early subacute  
54 stroke patients (within the first 14 days post-stroke), suffering from a hand motor deficit due to  
55 ischemic stroke, are screened for study participation by a stroke-specialized neurologist.  
56  
57  
58  
59  
60

1  
2  
3 Eligible patients are invited to participate in the study by the investigator, who obtains written  
4 informed consent. Several motor scores, as well as the general neurological status and  
5 electrophysiological measures of motor-cortical excitability, are assessed at the day of  
6 enrolment (T0) as well as one day after the last iTBS intervention (T9). A longitudinal follow-  
7 up after three to six months (T10) assesses after-effects that extend into the chronic post-  
8 stroke phase. Of note, the first post-intervention assessment at T9 takes place one day after  
9 stimulation and hence does not reflect immediate stimulation after-effects. All patients undergo  
10 the same experimental procedure receiving iTBS interventions before physiotherapy on days  
11 T1-T8 (Figure 1), the latter conducted as a routine part of the early rehabilitation program  
12 provided by the Department of Neurology, University Hospital Cologne. This program (total  
13 duration of 300 min per day) includes daily physiotherapy, occupational, and speech therapy,  
14 for at least two weeks. This time frame determines the duration of the iTBS intervention phase,  
15 which aims at eight stimulations on consecutive workdays. Note that the intended stimulation  
16 period is more extended than the five stimulations employed in our pilot study [24] in order to  
17 increase the total stimulation dose. In case that 8 stimulations cannot be performed due to  
18 organizational reasons (e.g., transfer of the patient to another rehab center), a minimum of five  
19 stimulations is necessary to be included into the final analysis [24]. A stimulation period longer  
20 than 8 days was not considered feasible without delaying further medical plans or subsequent  
21 treatment after transfer to a rehabilitation center. Importantly, both groups receive the same  
22 amount of motor training, with cohorts solely differing in receiving M1-iTBS or control-iTBS  
23 before the physiotherapy session (see below). Details on trial characteristics, based on the  
24 WHO trial registration dataset are provided in Table 1.  
25  
26  
27  
28  
29  
30  
31  
32  
33  
34  
35  
36  
37  
38  
39  
40  
41  
42  
43  
44  
45  
46  
47  
48  
49  
50  
51  
52  
53

#### 54 *Patient and public involvement*

55  
56 The study was designed based on the available literature related to optimizing motor recovery  
57 of stroke patients using iTBS, as described in the introduction. There was no public  
58 involvement in the study design.  
59  
60

### *iTBS protocol*

As a predominantly facilitatory rTMS protocol, iTBS has been rendered safe and effective, increasing cortical excitability in healthy subjects [39] and acute stroke patients [40]. One session of iTBS consists of 3 pulses delivered at a frequency of 50 Hz every 200 ms during 2 s (10 bursts), which are repeated every 10 s for a total duration of 3.5 min (600 pulses) [39]. For patients assigned to the study arm receiving an effective intervention, the protocol is applied over the ipsilesional M1, whereas patients in the control group receive iTBS over the parieto-occipital vertex, corresponding to the POz location of a 10-20 EEG system. Importantly, to prevent effective stimulation of cortical tissue in the control condition, the handle of the coil was placed parallel to the interhemispheric fissure pointing to the front. Besides, the coil was tilted upwards about 45°, touching the skull not with the center but with the rim to increase the coil-brain distance. This procedure induces similar acoustic and tactile effects as M1 stimulation without leading to a change of motor behavior, motor cortical excitability, or neural activity as measured with fMRI [23,24,41,42,43]. Compared to other facilitatory rTMS protocols, the short duration of the intervention (3.5 min) enables a good integration of iTBS in training schedules even when patients are severely affected. The second advantage of iTBS is its relatively low stimulation intensity, reducing the risk of adverse reactions, particularly seizures [44]. The stimulation intensity of iTBS is individually adapted in each patient according to the excitability of the ipsilesional motor cortex. The original iTBS protocol, as published by Huang and colleagues [39], set the stimulation intensity to 80% of the active motor threshold (AMT). However, assessment of the AMT requires subjects to perform constant contractions of the hand muscles, which is often impossible for stroke patients with severe hand motor weakness. The present study, therefore, set stimulation intensities to 70% of the RMT, which is independent of the patients' motor abilities. Of note, using 70% RMT instead of 80% AMT has been repeatedly demonstrated to induce comparable aftereffects on cortical excitability [23,45,46], allowing an effective application of iTBS in stroke [24]. As shown in our proof-of-

1  
2  
3 principle study [24], stimulation thresholds may exceed the maximum stimulator output (MSO)  
4  
5 in case of a severe disruption of the corticospinal tract leading to no recordable MEPs. Here,  
6  
7 the stimulation intensity is set to 50% MSO, which represents the upper limit for 50-Hz  
8  
9 stimulation using a standard Magstim SuperRapid2 stimulator and which has been proven to  
10  
11 be safe.  
12  
13  
14  
15  
16

### 17 *Inclusion- and exclusion criteria*

18  
19  
20  
21 Inclusion and exclusion criteria are defined in line with previous iTBS studies in stroke [23,24]  
22  
23 and the guidelines for the use of rTMS in clinical practice and research [44,47,48].  
24  
25

26 Inclusion criteria are:

- 27
- 28 • Written informed consent
- 29
- 30 • Age 40-90 years
- 31
- 32 • Ischemic stroke
- 33
- 34 • Hemiparesis with impaired unilateral hand motor function
- 35

36 Exclusion criteria are:

- 37
- 38 • Subjects legally detained in an official institute
- 39
- 40 • Participation in a clinical trial within the last 12 weeks
- 41
- 42 • Electronic or ferromagnetic implants located in the head, neck or thorax (e.g., clips,  
43 intracranial shunt, artificial heart valve, pacemaker, medication pump)
- 44
- 45 • Metal splinters in eye or head
- 46
- 47 • Pregnancy/breastfeeding
- 48
- 49 • Severe neurodegenerative disease (e.g., Parkinson's disease, Alzheimer's disease)
- 50
- 51 • Severe neuroinflammatory disease (e.g., multiple sclerosis)
- 52
- 53 • History of seizures/epilepsy
- 54
- 55 • Physical addiction to alcohol, medication, or drugs (excluded: nicotine)
- 56
- 57 • Insufficient compliance
- 58
- 59
- 60



- Present or past malignant tumor involving the central nervous system
- Severe psychiatric disease (e.g., schizophrenia)
- Bilateral hemiparesis or infarcts to the primary motor cortex or the corticospinal tract in the hemisphere ipsilateral to the hemiparesis
- Pre-existing cerebral infarctions with hemiparesis or pre-existing cerebral infarctions affecting the primary motor cortex or the corticospinal tract, excluding minor small vessel disease changes (e.g., clinically asymptomatic lacunae <1cm)
- Known brain lesion (surgical, traumatic)
- Evidence for enhanced cerebral pressure
- Severe cardiac dysfunction
- Life expectancy < 12 months
- NIHSS Score at enrolment > 20
- Blood glucose imbalances resistant to treatment (<50 mg/dl or >300 mg/dl)
- Elevated blood pressure resistant to treatment (RR > 185/110mmHg)
- Systemic thrombolysis using r-tPA or thrombectomy within the last 24 hours before enrolment in the study
- Medication with benzodiazepines, high-potency antipsychotics, or tricyclic antidepressants before hospitalization or long-term during hospitalization

### *Outcome measures*

The primary endpoint of this study is relative grip strength defined as of the maximum grip strength of the affected (paretic) hand compared to the unaffected hand, assessed three to six months after the intervention, i.e., in the chronic phase post-stroke. While motor recovery after stroke may be assessed with several measures, we selected grip strength based on the following rationale: First, relative grip strength represents a fundamental feature of hand motor function. Second, the assessment of grip strength can be conducted efficiently at the bedside, even in severely affected patients. A stroke leading to hemiparesis typically reduces grip

1  
2  
3 strength. In turn, recovery of grip strength usually precedes the recovery of other motor  
4 domains such as dexterity or movement speed [49].  
5  
6  
7

8 Furthermore, improvements in grip strength predominantly reflect the restitution of neurological  
9 function as grip strength is less dependent on alternative movement strategies such as  
10 compensatory movements. Besides, grip strength is mediated by contralateral M1 activity [50].  
11  
12 Therefore, given that in the present study iTBS is applied to enhance M1 activity, grip strength  
13 seems to be a sensitive readout to monitor improvements of M1. Finally, as the present study  
14 is designed based on a pilot study that also used grip force as the primary outcome parameter  
15 [24], we aimed at reproducing the beneficial effects of iTBS on the recovery of grip force.  
16  
17 Besides, we further assess the impact of iTBS on the motor recovery in other parameters  
18 frequently used to study motor performance after stroke. These secondary endpoints comprise  
19 different measures of gross and fine upper limb function assessed by the Action Research Arm  
20 Test (ARAT [51]) and the Fugl-Meyer Motor Scale (FM [52]) of the upper extremity, stroke  
21 severity measured by the National Institutes of Health stroke scale (NIHSS), general disability  
22 (modified Rankin Scale, mRS [53]), and quality of life (EuroQol 5D including the visual  
23 analogue scale, EQ-5D). Moreover, in order to obtain electrophysiological measures of  
24 corticospinal integrity, motor evoked potentials (MEP) and the RMT of the ipsilesional M1 are  
25 included as secondary endpoints. Finally, to account for differences in rehabilitation treatments  
26 between completion of the intervention (T9) and the follow-up assessment (T10), we document  
27 the performance in activities of daily living assessed by the Barthel scale as well as the duration  
28 of stay in external rehabilitation facilities.  
29  
30  
31  
32  
33  
34  
35  
36  
37  
38  
39  
40  
41  
42  
43  
44  
45  
46  
47  
48

49 In sum, these tests provide a detailed assessment, monitoring the clinical and  
50 electrophysiological condition of patients before and after iTBS (Table 2).  
51  
52  
53  
54  
55  
56

### 57 *Randomization and stratification*

58  
59  
60 After obtaining informed consent, randomization is performed using the 24/7 online

1  
2  
3 randomization tool ALEA (FormsVision BV, Abcoude, NL). Patients are allocated 1:1 into the  
4  
5 intervention groups, receiving “verum” or “control” iTBS. In order to balance groups regarding  
6  
7 potential confounding factors, randomization is stratified based on patients’ age ( $\leq 68$ ,  $>68$   
8  
9 years), motor impairment (relative grip strength  $< 10\%$ ,  $10 - 70\%$ ,  $> 70\%$ ), and stimulation  
10  
11 intensity ( $\leq 50\%$ ,  $> 50\%$  maximal stimulator output), as these factors are known to impact on  
12  
13 motor recovery post-stroke [54,55].  
14  
15

### 16 17 *Statistical analysis*

18  
19  
20 After data collection, confirmatory and descriptive analyses will be conducted. In our proof-of-  
21  
22 principle study, we obtained data from a smaller sample [22], which revealed three to six  
23  
24 months after the intervention an increase of grip strength of  $38.1 \pm 28.7\%$  in patients treated  
25  
26 by iTBS versus  $26.2 \pm 11.7\%$  in the control stimulation group. Thus, the observed effect  
27  
28 strength amounted to 0.54. Using an unpaired t-Test with a two-sided 5% type I error and a  
29  
30 power of 80%, a sample of 110 patients is required (calculated using the software G\*Power  
31  
32 3.1.7). Assuming a drop-out rate of 25% based on the cohort of Volz and colleagues (2016),  
33  
34 an estimated sample of 150 recruited patients is needed.  
35  
36

37  
38 Variables are analyzed descriptively using mean, standard deviations, quantiles (0, 25, 50, 75,  
39  
40 100), or count and frequency, respectively. The final statistical analysis is carried out in an  
41  
42 intention to treat (ITT) collective including all patients who received at least one intervention  
43  
44 (verum or control) with a subsequent grip strength testing, to assess the safety and efficacy of  
45  
46 iTBS. Moreover, a supportive analysis is performed based on the “per protocol” (PP) collective,  
47  
48 which includes all patients who underwent at least five [24] interventions (verum or control)  
49  
50 and provided grip force measures at baseline and the three to six months follow-up.  
51

52  
53 The primary endpoint, i.e., the change in grip strength after three months (T10), is analyzed  
54  
55 using a linear mixed model with repeated measurements, in which the factors group (verum,  
56  
57 control), time, group x time, and strata at baseline (age, motor impairment, stimulation  
58  
59 intensity) will be entered. Moreover, the model will account for the number of data points  
60  
obtained during the intervention phase (T1 – T9). The primary hypothesis is addressed using

1  
2  
3 a customized test (contrast) to compare the change from baseline (T0) to three to six months  
4 (T10) between the two treatment groups. Mean difference, corresponding 95% confidence  
5 interval, and the p-value (two-sided) will be presented.  
6  
7

8  
9 All secondary variables will be analyzed similarly or using unpaired t-tests or Mann-Whitney U  
10 tests, respectively. (Serious) Adverse events are listed. Subgroup analyses will be performed  
11 for randomization stratification variables and length of rehabilitation therapy. The current  
12 version of SPSS Statistics (IBM Corp., Armonk, NY, USA) will be used for the statistical  
13 analyses.  
14  
15  
16  
17  
18  
19

### 20 21 22 23 *Blinding*

24  
25  
26 The study is carried out using a double-blinded design, in which neither the patients nor the  
27 testing physicians or statisticians are aware of the intervention arm (verum or control). As  
28 applying iTBS over different stimulation sites (depending on the patients' intervention arm)  
29 implicates that physicians performing the intervention cannot be blinded, the intervention team  
30 needs to be separated into blinded physicians performing patient recruitment and  
31 examinations, and unblinded physicians exclusively applying iTBS. Thereby, we ensure that  
32 both patients and investigators are blinded during the assessment of outcome parameters  
33 throughout the entire study procedure. In the case of an emergency unblinding, investigators  
34 at the Department of Neurology have access to sealed envelopes labelled with the patients'  
35 randomization numbers. To maintain the quality of the trial, a patient's allocation should only  
36 be unblinded in exceptional circumstances when knowledge of the actual treatment is essential  
37 for the management of the patient.  
38  
39  
40  
41  
42  
43  
44  
45  
46  
47  
48  
49  
50  
51

### 52 53 54 55 *Safety*

56  
57  
58 The exclusion criteria of the present trial follow the latest safety recommendations for rTMS  
59 [44,48], thereby reducing the risk of adverse events or reactions to iTBS to a minimum.  
60

1  
2  
3 Adverse events (AE) or serious adverse events (SAEs) are assessed throughout the entire  
4 observation period of the study, including all scheduled visits T0 – T10. All events are reported  
5 to the federal authorities (Federal Institute for Drugs and Medical Devices, BfArM). In our pilot  
6 study [24], no severe adverse event occurred, especially no focal or generalized seizures.  
7  
8  
9  
10

#### 11 12 13 14 15 *Documentation and quality assurance*

16  
17  
18 All data assessed during the trial are documented promptly after data acquisition and entered  
19 into the electronic case report form (eCRF) by the responsible investigators. Regular monitor  
20 inspections ensure high quality of documentation and the correct implementation of the study  
21 protocol. The Clinical Trials Centre Cologne (CTCC Cologne) is responsible for the monitoring.  
22 Besides the initiation visit at the beginning and the close-out visit at the end of the study,  
23 monitoring visits are performed on average after every tenth patient included. Thus, at least  
24 15 visits are scheduled. Monitoring visits include a review of source data documented in the  
25 eCRF, written consent, inclusion and exclusion criteria.  
26  
27  
28  
29  
30  
31  
32  
33  
34  
35  
36  
37  
38  
39

#### 40 *Data collection and management*

41  
42 CTCC Cologne performs the data management. The commercial online software TrialMaster™  
43 (OmniComm.com) is used as a data management system, ensuring data safety by a firewall  
44 and backup system, including multiple data storage sites. The database was developed and  
45 validated by the CTCC Cologne.  
46  
47  
48  
49  
50  
51

52 All data collectors are stroke-specialized neurologists who have been trained in good clinical  
53 practice (GCP). After the investigators enter the data into the eCRF, the CTCC Cologne  
54 reviews the data for completeness and plausibility. The data manager and investigators  
55 resolve discrepancies and implausible entries.  
56  
57  
58  
59  
60

1  
2  
3 Only researchers involved in the data collection, management and data analysis will have  
4 access to the final dataset. However, the principal investigator allows direct access to all  
5 source data and documents at monitoring, and inspection from federal authorities (Federal  
6 Institute for Drugs and Medical Devices, BfArM).  
7  
8  
9  
10

### 11 12 13 14 15 **Ethics and dissemination** 16

17  
18 The Ethics Commission of the Faculty of Medicine of the University of Cologne approved this  
19 protocol and its amendments (reference number 15 - 343). The amendments leading to the  
20 current version (version 3, November 15th 2018) were made to increase the number of patients  
21 participating in the study. By better specification of the exclusion criteria, more patients can be  
22 included without additional safety concerns. Before entering the study, all participants are  
23 informed that their participation is entirely voluntary, and that their withdrawal of consent is  
24 possible at any time without further consequences. All requirements regarding the well-being,  
25 insurance, rights, and privacy of participants are fulfilled. The study findings will be reported at  
26 conferences and in peer-reviewed journals.  
27  
28  
29  
30  
31  
32  
33  
34  
35  
36  
37  
38  
39  
40  
41  
42  
43  
44  
45  
46  
47  
48  
49  
50  
51  
52  
53  
54  
55  
56  
57  
58  
59  
60

### **Trial status**

At the time of submission, recruitment has not been completed.

### **Abbreviations**

AE: adverse event, AMT: active motor threshold, ARAT: Action Research Arm Test, CTCC: Clinical Trials Center Cologne, eCRF: electronic case report form; rTMS: repetitive Transcranial magnetic stimulation; EV: Evaluation visit, FM: Fugl-Meyer Motor Scale of the upper extremity, GCP: good clinical practice, iTBS: intermittent theta-burst stimulation, M1: primary motor cortex, MEP: motor evoked potential, mRS: modified Rankin Scale, NIHSS: National Institutes of Health stroke scale, tDCS: transcranial direct current stimulation, RCT: randomized controlled trial, RMT: resting motor threshold, r-tPA: recombinant tissue-type plasminogen activator, SAE: serious adverse event

### **Funding**

This trial is supported by the Max-Delbrück Prize to GRF and by the University of Cologne Emerging Groups Initiative (CONNECT group; CG and GRF) implemented into the Institutional Strategy of the University of Cologne and the German Excellence Initiative.

### **Author contributions**

CG, LH, LJV, and GRF developed the study design and wrote the statistical analysis plan in collaboration with DK and SH. LH, CR, CG, and GRF perform the clinical evaluation. CT conducts rTMS interventions. LH and CG wrote the first draft of the manuscript. CT, LJV, and GRF revised it for intellectual content. All authors read and approved the final manuscript.

## Sponsor

University of Cologne, Albertus-Magnus-Platz 50923 Cologne

## Competing interests

None of the authors have anything to disclose.

## Ethics approval and consent to participate

The Ethics Commission of the Medical Faculty of the University of Cologne (reference number 15 - 343) approved the study and its amendments:

First approval November 2<sup>nd</sup> 2015 (original version).

Amendment (version 2.22) approved and implemented December 20<sup>th</sup> 2016. Specification of exclusion criteria.

Amendment (version 3) approved and implemented November 15<sup>th</sup> 2018. Change of inclusion and exclusion criteria.

Written informed consent is obligatory before study participation. The study is registered at the German Clinical Trials Register (DRKS, [www.drks.de](http://www.drks.de), DRKS-ID: DRKS00008963) and the ClinicalTrials.gov database (Identifier: NCT02910024).

## Data sharing statement

The data collected in this study are available from the corresponding author upon reasonable request after the first manuscript has been published.



## References

- 1 Feigin VL, Forouzanfar MH, Krishnamurthi R, *et al.* Global and regional burden of stroke during 1990-2010: findings from the Global Burden of Disease Study 2010. *Lancet* 2014;**383**:245–54.
- 2 Saver JL, Goyal M, Bonafe A, *et al.* Stent-retriever thrombectomy after intravenous t-PA vs. t-PA alone in stroke. *N Engl J Med* 2015;**372**:2285–95. doi:10.1056/NEJMoa1415061
- 3 Gresham GE, Fitzpatrick TE, Wolf PA, *et al.* Residual disability in survivors of stroke--the Framingham study. *N Engl J Med* 1975;**293**:954–6. doi:10.1056/NEJM197511062931903
- 4 Carod-Artal J, Egido JA, González JL, *et al.* Quality of life among stroke survivors evaluated 1 year after stroke: experience of a stroke unit. *Stroke* 2000;**31**:2995–3000.
- 5 Cramer SC. Repairing the human brain after stroke: I. Mechanisms of spontaneous recovery. *Ann Neurol* 2008;**63**:272–87. doi:10.1002/ana.21393
- 6 Nudo RJ. Recovery after brain injury: mechanisms and principles. *Frontiers in Human Neuroscience* 2013;**7**:887. doi:10.3389/fnhum.2013.00887
- 7 Chollet F, DiPiero V, Wise RJ, *et al.* The functional anatomy of motor recovery after stroke in humans: a study with positron emission tomography. *Ann Neurol* 1991;**29**:63–71. doi:10.1002/ana.410290112
- 8 Ward NS, Brown MM, Thompson AJ, *et al.* Neural correlates of motor recovery after stroke: a longitudinal fMRI study. *Brain* 2003;**126**:2476–96. doi:10.1093/brain/awg245
- 9 Grefkes C, Nowak DA, Eickhoff SB, *et al.* Cortical connectivity after subcortical stroke assessed with functional magnetic resonance imaging. *Ann Neurol* 2008;**63**:236–46. doi:10.1002/ana.21228
- 10 Rehme AK, Volz LJ, Feis D-L, *et al.* Individual prediction of chronic motor outcome in the acute post-stroke stage: Behavioral parameters versus functional imaging. *Hum Brain Mapp* 2015;**36**:4553–65. doi:10.1002/hbm.22936
- 11 Rehme AK, Eickhoff SB, Rottschy C, *et al.* Activation likelihood estimation meta-analysis of motor-related neural activity after stroke. *NeuroImage* 2012;**59**:2771–82. doi:10.1016/j.neuroimage.2011.10.023
- 12 Volz LJ, Hamada M, Rothwell JC, *et al.* What Makes the Muscle Twitch: Motor System Connectivity and TMS-Induced Activity. *Cerebral Cortex* Published Online First: 7 March 2014. doi:10.1093/cercor/bhu032
- 13 Pennisi G, Alagona G, Rapisarda G, *et al.* Transcranial magnetic stimulation after pure motor stroke. *Clin Neurophysiol* 2002;**113**:1536–43.
- 14 Stinear CM, Barber PA, Petoe M, *et al.* The PREP algorithm predicts potential

- 1  
2  
3 for upper limb recovery after stroke. *Brain* 2012;**135**:2527–35.  
4 doi:10.1093/brain/aws146  
5
- 6 15 Maulden SA, Gassaway J, Horn SD, *et al.* Timing of initiation of rehabilitation  
7 after stroke. *Arch Phys Med Rehabil* 2005;**86**:S34–S40.  
8 doi:10.1016/j.apmr.2005.08.119  
9
- 10 16 Pollock A, Farmer SE, Brady MC, *et al.* Interventions for improving upper limb  
11 function after stroke. *Cochrane Database Syst Rev* 2014;**23**:CD010820.  
12 doi:10.1002/14651858.CD010820.pub2  
13  
14
- 15 17 Pin-Barre C, plasticity JLN, 2015. Physical exercise as a diagnostic,  
16 rehabilitation, and preventive tool: influence on neuroplasticity and motor  
17 recovery after stroke. *hindawicom* doi:10.1155/2015/608581  
18
- 19 18 Grefkes C, Fink GR. Disruption of motor network connectivity post-stroke and  
20 its noninvasive neuromodulation. *Current Opinion in Neurology* 2012;**25**:670–5.  
21 doi:10.1097/WCO.0b013e3283598473  
22  
23
- 24 19 Grefkes C, Fink GR. Noninvasive brain stimulation after stroke: it is time for  
25 large randomized controlled trials! *Current Opinion in Neurology* 2016;**29**:714–  
26 20. doi:10.1097/WCO.0000000000000395  
27
- 28 20 Hummel FC, Cohen LG. Non-invasive brain stimulation: a new strategy to  
29 improve neurorehabilitation after stroke? *Lancet Neurol* 2006;**5**:708–12.  
30 doi:10.1016/S1474-4422(06)70525-7  
31  
32
- 33 21 Hummel FC, Cohen LG. Non-invasive brain stimulation: a new strategy to  
34 improve neurorehabilitation after stroke? *The Lancet Neurology* 2006;**5**:708–12.  
35 doi:10.1016/S1474-4422(06)70525-7  
36  
37
- 38 22 Ziemann U. Improving disability in stroke with RTMS. *Lancet Neurol*  
39 2005;**4**:454–5. doi:10.1016/S1474-4422(05)70126-5  
40
- 41 23 Nettekoven C, Volz LJ, Kutscha M, *et al.* Dose-dependent effects of theta burst  
42 rTMS on cortical excitability and resting-state connectivity of the human motor  
43 system. *Journal of Neuroscience* 2014;**34**:6849–59.  
44 doi:10.1523/JNEUROSCI.4993-13.2014  
45
- 46 24 Volz LJ, Rehme AK, Michely J, *et al.* Shaping Early Reorganization of Neural  
47 Networks Promotes Motor Function after Stroke. *Cerebral Cortex*  
48 2016;**26**:2882–94. doi:10.1093/cercor/bhw034  
49
- 50 25 Ameli M, Grefkes C, Kemper F, *et al.* Differential effects of high-frequency  
51 repetitive transcranial magnetic stimulation over ipsilesional primary motor  
52 cortex in cortical and subcortical middle cerebral artery stroke. *Ann Neurol*  
53 2009;**66**:298–309. doi:10.1002/ana.21725  
54  
55
- 56 26 Khedr EM, Ahmed MA, Fathy N, *et al.* Therapeutic trial of repetitive transcranial  
57 magnetic stimulation after acute ischemic stroke. *Neurology* 2005;**65**:466–8.  
58 doi:10.1212/01.wnl.0000173067.84247.36  
59
- 60 27 Ackerley SJ, Stinear CM, Barber PA, *et al.* Combining theta burst stimulation

- with training after subcortical stroke. *Stroke* 2010;**41**:1568–72.  
doi:10.1161/STROKEAHA.110.583278
- 28 Talelli P, Wallace A, Dileone M, *et al.* Theta burst stimulation in the rehabilitation of the upper limb: a semirandomized, placebo-controlled trial in chronic stroke patients. *Neurorehabil Neural Repair* 2012;**26**:976–87.  
doi:10.1177/1545968312437940
- 29 Reis J, Robertson EM, Krakauer JW, *et al.* Consensus: Can transcranial direct current stimulation and transcranial magnetic stimulation enhance motor learning and memory formation? *Brain Stimulation* 2008;**1**:363–9.  
doi:10.1016/j.brs.2008.08.001
- 30 Volz LJ, Grefkes C. Basic principles of rTMS in motor recovery after stroke. *Therapeutic rTMS in Neurology* Published Online First: 2016. doi:10.1007/978-3-319-25721-1\_1
- 31 Hsu WY, Cheng CH, Liao KK, *et al.* Effects of Repetitive Transcranial Magnetic Stimulation on Motor Functions in Patients With Stroke A Meta-Analysis. *Stroke* 2012. doi:10.1161/STROKEAHA.111.649756/-/DC1
- 32 Adeyemo BO, Simis M, Macea DD, *et al.* Systematic review of parameters of stimulation, clinical trial design characteristics, and motor outcomes in non-invasive brain stimulation in stroke. *Frontiers in Psychiatry* 2012;**3**:88.  
doi:10.3389/fpsy.2012.00088
- 33 Hao Z, Wang D, Zeng Y, *et al.* Repetitive transcranial magnetic stimulation for improving function after stroke. *Cochrane Database Syst Rev* 2013;**78**:CD008862. doi:10.1002/14651858.CD008862.pub2
- 34 Harvey RL, Edwards D, Dunning K, *et al.* Randomized Sham-Controlled Trial of Navigated Repetitive Transcranial Magnetic Stimulation for Motor Recovery in Stroke. *Stroke* 2018;**49**:2138–46. doi:10.1161/STROKEAHA.117.020607
- 35 Buma F, Kwakkel G, Ramsey N. Understanding upper limb recovery after stroke. *Restor Neurol Neurosci* 2013;**31**:707–22. doi:10.3233/RNN-130332
- 36 Rehme AK, Volz LJ, Feis D-L, *et al.* Identifying Neuroimaging Markers of Motor Disability in Acute Stroke by Machine Learning Techniques. *Cerebral Cortex* 2015;**25**:3046–56. doi:10.1093/cercor/bhu100
- 37 Rehme AK, Fink GR, Cramon von DY, *et al.* The role of the contralesional motor cortex for motor recovery in the early days after stroke assessed with longitudinal FMRI. *Cerebral Cortex* 2011;**21**:756–68.  
doi:10.1093/cercor/bhq140
- 38 Rehme AK, Eickhoff SB, Wang LE, *et al.* Dynamic causal modeling of cortical activity from the acute to the chronic stage after stroke. *NeuroImage* 2011;**55**:1147–58. doi:10.1016/j.neuroimage.2011.01.014
- 39 Huang Y-Z, Edwards MJ, Rounis E, *et al.* Theta burst stimulation of the human motor cortex. *Neuron* 2005;**45**:201–6. doi:10.1016/j.neuron.2004.12.033

- 1  
2  
3 40 Di Lazzaro V, Profice P, Pilato F, *et al.* Motor cortex plasticity predicts recovery  
4 in acute stroke. *Cerebral Cortex* 2010;**20**:1523–8. doi:10.1093/cercor/bhp216  
5  
6 41 Cárdenas-Morales L, Volz LJ, Michely J, *et al.* Network connectivity and  
7 individual responses to brain stimulation in the human motor system. *Cerebral*  
8 *Cortex* 2014;**24**:1697–707. doi:10.1093/cercor/bht023  
9  
10 42 Nettekoven C, Volz LJ, Leimbach M, *et al.* Inter-individual variability in cortical  
11 excitability and motor network connectivity following multiple blocks of rTMS.  
12 *NeuroImage* 2015;**118**:209–18. doi:10.1016/j.neuroimage.2015.06.004  
13  
14 43 Diekhoff-Krebs S, Pool E-M, Sarfeld A-S, *et al.* Interindividual differences in  
15 motor network connectivity and behavioral response to iTBS in stroke patients.  
16 *Neuroimage Clin* 2017;**15**:559–71. doi:10.1016/j.nicl.2017.06.006  
17  
18 44 Rossi S, Hallett M, Rossini PM, *et al.* Safety, ethical considerations, and  
19 application guidelines for the use of transcranial magnetic stimulation in clinical  
20 practice and research. 2009;**120**:2008–39. doi:10.1016/j.clinph.2009.08.016  
21  
22 45 Cárdenas-Morales L, Volz LJ, Michely J, *et al.* Network connectivity and  
23 individual responses to brain stimulation in the human motor system. *Cerebral*  
24 *Cortex* 2014;**24**:1697–707. doi:10.1093/cercor/bht023  
25  
26 46 Gentner R, Wankerl K, Reinsberger C, *et al.* Depression of human corticospinal  
27 excitability induced by magnetic theta-burst stimulation: evidence of rapid  
28 polarity-reversing metaplasticity. *Cerebral Cortex* 2008;**18**:2046–53.  
29 doi:10.1093/cercor/bhm239  
30  
31 47 Wassermann EM. Risk and safety of repetitive transcranial magnetic stimulation:  
32 report and suggested guidelines from the International Workshop on the Safety of  
33 Repetitive Transcranial Magnetic Stimulation, June 5-7, 1996.  
34 *Electroencephalogr Clin Neurophysiol.* 1998;**108**:1–16.  
35  
36 48 Rossini PM, Burke D, Chen R, *et al.* Non-invasive electrical and magnetic  
37 stimulation of the brain, spinal cord, roots and peripheral nerves: Basic principles  
38 and procedures for routine clinical and research application. An updated report  
39 from an I.F.C.N. Committee. *Clin Neurophysiol* 2015;**126**:1071–107.  
40 doi:10.1016/j.clinph.2015.02.001  
41  
42 49 Heller A, Wade DT, Wood VA, *et al.* Arm function after stroke: measurement  
43 and recovery over the first three months. *J Neurol Neurosurg Psychiatr*  
44 1987;**50**:714–9. doi:10.1136/jnnp.50.6.714  
45  
46 50 Ward NS, Newton JM, Swayne OBC, *et al.* The relationship between brain  
47 activity and peak grip force is modulated by corticospinal system integrity after  
48 subcortical stroke. *Eur J Neurosci* 2007;**25**:1865–73. doi:10.1111/j.1460-  
49 9568.2007.05434.x  
50  
51 51 Lyle RC. A performance test for assessment of upper limb function in physical  
52 rehabilitation treatment and research. *International Journal of Rehabilitation*  
53 *Research* 1981;**4**:483.  
54  
55 52 Fugl-Meyer AR, Jääskö L, Leyman I, Olsson S, Steglind S. The post-stroke  
56  
57  
58  
59  
60

1  
2  
3 hemiplegic patient. A method for evaluation of physical performance. *Scand J*  
4 *Rehabil Med.* 1975;7:13–31.  
5

6 53 Rankin J. Cerebral vascular accidents in patients over the age of 60. I. General  
7 considerations. *Scott Med J* 1957;2:127–36.  
8

9 54 Bembenek JP, Kurczych K, Karli Nski M, *et al.* The prognostic value of motor-  
10 evoked potentials in motor recovery and functional outcome after stroke – a  
11 systematic review of the literature. *Funct Neurol* 2012;27:79–84.  
12  
13

14 55 Kwakkel G, Kollen BJ. Predicting activities after stroke: what is clinically  
15 relevant? *Int J Stroke* 2013;8:25–32. doi:10.1111/j.1747-4949.2012.00967.x  
16  
17  
18  
19  
20  
21  
22  
23  
24  
25  
26  
27  
28  
29  
30  
31  
32  
33  
34  
35  
36  
37  
38  
39  
40  
41  
42  
43  
44  
45  
46  
47  
48  
49  
50  
51  
52  
53  
54  
55  
56  
57  
58  
59  
60

**Table 1**

| <b>Trial characteristics based on WHO trial registration dataset</b> |                                                                                                                                                                                                                                                                                                                                                                                                                                                                                                                                                                                                                                                                                                                                                                                                                                                              |
|----------------------------------------------------------------------|--------------------------------------------------------------------------------------------------------------------------------------------------------------------------------------------------------------------------------------------------------------------------------------------------------------------------------------------------------------------------------------------------------------------------------------------------------------------------------------------------------------------------------------------------------------------------------------------------------------------------------------------------------------------------------------------------------------------------------------------------------------------------------------------------------------------------------------------------------------|
| Data category                                                        | Trial information                                                                                                                                                                                                                                                                                                                                                                                                                                                                                                                                                                                                                                                                                                                                                                                                                                            |
| Primary registry and trial identifying number                        | German Clinical Trials Register (DRKS)<br>DRKS-ID: DRKS00008963                                                                                                                                                                                                                                                                                                                                                                                                                                                                                                                                                                                                                                                                                                                                                                                              |
| Date of registration in primary registry                             | 2016 - February - 16                                                                                                                                                                                                                                                                                                                                                                                                                                                                                                                                                                                                                                                                                                                                                                                                                                         |
| Secondary identifying numbers                                        | ClinicalTrials.gov (NCT02910024)                                                                                                                                                                                                                                                                                                                                                                                                                                                                                                                                                                                                                                                                                                                                                                                                                             |
| Source(s) of monetary or material support                            | The study is conducted as an investigator initiated study supported by the Max-Delbrück Prize to GRF and by the University of Cologne Emerging Groups Initiative (CONNECT group; CG and GRF) implemented into the Institutional Strategy of the University of Cologne and the German Excellence Initiative.                                                                                                                                                                                                                                                                                                                                                                                                                                                                                                                                                  |
| Primary sponsor                                                      | University of Cologne, Albertus-Magnus-Platz 50923 Cologne                                                                                                                                                                                                                                                                                                                                                                                                                                                                                                                                                                                                                                                                                                                                                                                                   |
| Secondary sponsor                                                    | NA                                                                                                                                                                                                                                                                                                                                                                                                                                                                                                                                                                                                                                                                                                                                                                                                                                                           |
| Contact for public queries                                           | Prof. Gereon R. Fink (gereon.fink@uk-koeln.de)                                                                                                                                                                                                                                                                                                                                                                                                                                                                                                                                                                                                                                                                                                                                                                                                               |
| Contact for scientific queries                                       | Prof. Gereon R. Fink (gereon.fink@uk-koeln.de)                                                                                                                                                                                                                                                                                                                                                                                                                                                                                                                                                                                                                                                                                                                                                                                                               |
| Public title                                                         | Theta-Burst-Stimulation in early Rehabilitation of Stroke                                                                                                                                                                                                                                                                                                                                                                                                                                                                                                                                                                                                                                                                                                                                                                                                    |
| Scientific title                                                     | Theta-Burst-Stimulation in early Rehabilitation of Stroke                                                                                                                                                                                                                                                                                                                                                                                                                                                                                                                                                                                                                                                                                                                                                                                                    |
| Country of recruitment                                               | Germany                                                                                                                                                                                                                                                                                                                                                                                                                                                                                                                                                                                                                                                                                                                                                                                                                                                      |
| Healthy conditions(s) or problems studied                            | Stroke with hemiparesis including impaired hand motor function                                                                                                                                                                                                                                                                                                                                                                                                                                                                                                                                                                                                                                                                                                                                                                                               |
| Interventions                                                        | Active Comparator: Real-rTMS<br>Repetitive transcranial magnetic stimulation (rTMS) of the primary motor cortex in the lesioned hemisphere using the intermittent theta-burst-stimulation protocol (iTBS; application of 3 pulses with a frequency of 50 Hz, in a theta-rhythm of 5 Hz for 2 seconds, repeated every 10 seconds, duration of one session: about 3,5 minutes) before physiotherapy for 8 days<br><br>Sham Comparator: Sham-rTMS<br>Repetitive transcranial magnetic stimulation (rTMS) in sham position (tilted coil over parieto-occipital vertex) before physiotherapy for 8 days                                                                                                                                                                                                                                                           |
| Key inclusion and exclusion criteria                                 | Inclusion Criteria: written consent, age: 40-90 years, ischemic stroke, hemiparesis with impaired hand motor function<br><br>Exclusion Criteria: Subjects who are legally detained in an official institute (§20 MPG), participation in clinical trial within the last 12 weeks, electronic implants or ferromagnetic Implants located in the head, neck or thorax (e.g. clips, intracranial shunt, artificial heart valve, pacemaker), medication pump (e.g. insulin pump), metal splinters in eye or head, pregnancy / breastfeeding, severe neurodegenerative disease, severe neuro-inflammatory disease, history of seizures / epilepsy, physical addiction to alcohol, medication, or drugs (excluded: nicotine), insufficient compliance, present or past malignant tumor involving the central nervous system, severe psychiatric disease, clinically |



|                         |                                                                                                                                                                                                                                                                                                                                                                                                                                                                                                                                                                                                                                                                                                                                                                                                                                                                                                                                                                                                                                                                                                                                                                                                                                                                                                                                                                                                         |
|-------------------------|---------------------------------------------------------------------------------------------------------------------------------------------------------------------------------------------------------------------------------------------------------------------------------------------------------------------------------------------------------------------------------------------------------------------------------------------------------------------------------------------------------------------------------------------------------------------------------------------------------------------------------------------------------------------------------------------------------------------------------------------------------------------------------------------------------------------------------------------------------------------------------------------------------------------------------------------------------------------------------------------------------------------------------------------------------------------------------------------------------------------------------------------------------------------------------------------------------------------------------------------------------------------------------------------------------------------------------------------------------------------------------------------------------|
|                         | manifest bilateral hemiparesis or infarcts in the primary motor cortex or along the corticospinal tract in the hemisphere ipsilateral to the hemiparesis, pre-existing cerebral infarctions with hemiparesis or pre-existing cerebral infarctions in the primary motor cortex or along the corticospinal tract, excluding microvascular changes (e.g. clinically asymptomatic lacunae <1cm), known brain lesion (surgical, traumatic), evidence for enhanced cerebral pressure, severe cardiac dysfunction, life expectancy < 12 months, NIHSS Score > 20, blood glucose imbalances resistant to treatment (<50 mg/dl or >300 mg/dl), elevated blood pressure resistant to treatment (RR > 185/110mmHg), systemic thrombolysis using rt-PA or thrombectomy within the last 24 hours before enrollment in study, medication with benzodiazepines, high-potency antipsychotics or tricyclic antidepressants before hospitalization or long-term during hospitalization                                                                                                                                                                                                                                                                                                                                                                                                                                    |
| Study type              | Interventional<br>Allocation: randomized intervention model.<br>Masking: double blind (subject, caregiver, investigator, outcomes assessor)<br>Assignment: parallel<br>Primary purpose: treatment                                                                                                                                                                                                                                                                                                                                                                                                                                                                                                                                                                                                                                                                                                                                                                                                                                                                                                                                                                                                                                                                                                                                                                                                       |
| Date of first enrolment | April 2016                                                                                                                                                                                                                                                                                                                                                                                                                                                                                                                                                                                                                                                                                                                                                                                                                                                                                                                                                                                                                                                                                                                                                                                                                                                                                                                                                                                              |
| Target sample size      | 150                                                                                                                                                                                                                                                                                                                                                                                                                                                                                                                                                                                                                                                                                                                                                                                                                                                                                                                                                                                                                                                                                                                                                                                                                                                                                                                                                                                                     |
| Recruitment status      | Recruiting                                                                                                                                                                                                                                                                                                                                                                                                                                                                                                                                                                                                                                                                                                                                                                                                                                                                                                                                                                                                                                                                                                                                                                                                                                                                                                                                                                                              |
| Primary outcome(s)      | Relative grip force (time frame: three to six months after enrollment)                                                                                                                                                                                                                                                                                                                                                                                                                                                                                                                                                                                                                                                                                                                                                                                                                                                                                                                                                                                                                                                                                                                                                                                                                                                                                                                                  |
| Key secondary outcomes  | Relative grip force (time frame: after 8 days of intervention, and three to six months after enrollment)<br>Action Research Arm Test (time frame: after 8 days of intervention, and three to six months after enrollment)<br>Fugl-Meyer Motor Scale of the upper extremity (time frame: after 8 days of intervention, and three to six months after enrollment)<br>National Institutes of Health Stroke Scale (time frame: after 8 days of intervention, and three to six months after enrollment)<br>Modified Rankin Scale (time frame: after 8 days of intervention, and three to six months after enrollment)<br>Motor evoked potential induced by stimulation of the affected motor cortex as a measure of motorcortex excitability (time frame: after 8 days of intervention, and three to six months after enrollment)<br>Resting motor threshold as measured by stimulation of the affected motor cortex as a measure of motorcortex excitability (time frame: after 8 days of intervention, and three to six months after enrollment)<br>EuroQol 5D questionnaire (time frame: after 8 days of intervention, and three to six months after enrollment)<br>Barthel-Index at admission and discharge in external rehabilitation facility (time frame: three to six months after enrollment)<br>Days of rehabilitation after intervention phase (time frame: three to six months after enrollment) |

**Table 2**

| Study period                                 | Pre-enrollment | T0 | T1 | T2 | T3 | T4 | T5 | T6 | T7 | T8 | T9 | T10 |
|----------------------------------------------|----------------|----|----|----|----|----|----|----|----|----|----|-----|
| Screening (in-/exclusion criteria)           | X              |    |    |    |    |    |    |    |    |    |    |     |
| Written informed consent                     |                | X  |    |    |    |    |    |    |    |    |    |     |
| Randomization                                |                | X  |    |    |    |    |    |    |    |    |    |     |
| Medical history                              | X              | X  |    |    |    |    |    |    |    |    |    |     |
| Neuroimaging (MRI/CT)                        | X              |    |    |    |    |    |    |    |    |    |    |     |
| TMS-intervention (M1 iTBS/control iTBS)      |                |    | X  | X  | X  | X  | X  | X  | X  | X  |    |     |
| Physiotherapy                                |                |    | X  | X  | X  | X  | X  | X  | X  | X  |    |     |
| Assessment of adverse events                 |                | X  | X  | X  | X  | X  | X  | X  | X  | X  | X  | X   |
| Relative grip strength                       | X              | X  | X  | X  | X  | X  | X  | X  | X  | X  | X  | X   |
| Documentation of medication                  |                | X  | X  | X  | X  | X  | X  | X  | X  | X  | X  | X   |
| Neurological examination                     | X              | X  |    |    |    |    |    |    |    |    | X  | X   |
| Electrophysiological examination (RMT, MEPs) |                | X  |    |    |    |    |    |    |    |    | X  | X   |
| Upper limb motor function (ARAT, FM)         |                | X  |    |    |    |    |    |    |    |    | X  | X   |
| Stroke severity (NIHSS)                      |                | X  |    |    |    |    |    |    |    |    | X  | X   |
| Disability (mRS)                             |                | X  |    |    |    |    |    |    |    |    | X  | X   |
| Quality of life (EQ-5D)                      |                | X  |    |    |    |    |    |    |    |    | X  | X   |
| Assessment of external rehabilitation time   |                |    |    |    |    |    |    |    |    |    |    | X   |

RMT: resting motor threshold; MEPs: Motor evoked potentials; ARAT: Action Research Arm Test; FM: Fugl-Meyer Motor Scale of the upper extremity; NIHSS: National Institutes of Health stroke scale; mRS: modified Rankin Scale; EQ-5D: EuroQol 5D including the visual analogue scale



1  
2  
3  
4  
5  
6  
7  
8  
9  
10  
11  
12  
13  
14  
15  
16  
17  
18  
19  
20  
21  
22  
23  
24  
25  
26  
27  
28  
29  
30  
31  
32  
33  
34  
35  
36  
37  
38  
39  
40  
41  
42  
43  
44  
45  
46  
47  
48  
49  
50  
51  
52  
53  
54  
55  
56  
57  
58  
59  
60

**Figure legends**

**Figure 1: Flow chart of study Procedure**

For peer review only

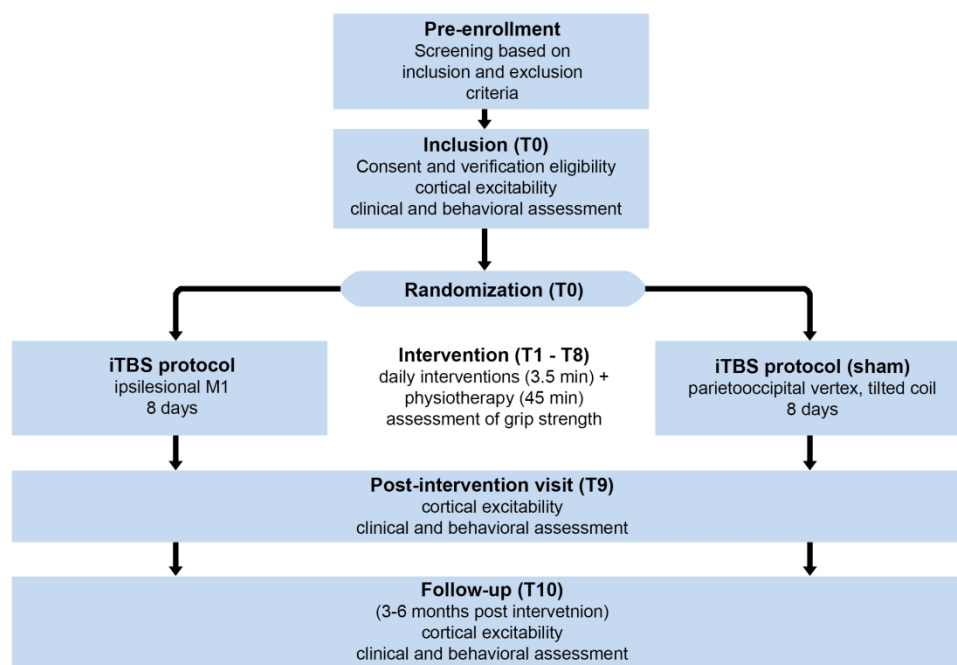

Figure 1. Flow chart of the study procedure

# Reporting checklist for protocol of a clinical trial.

Based on the SPIRIT guidelines.

## Instructions to authors

Complete this checklist by entering the page numbers from your manuscript where readers will find each of the items listed below.

Your article may not currently address all the items on the checklist. Please modify your text to include the missing information. If you are certain that an item does not apply, please write "n/a" and provide a short explanation.

Upload your completed checklist as an extra file when you submit to a journal.

In your methods section, say that you used the SPIRIT reporting guidelines, and cite them as:

Chan A-W, Tetzlaff JM, Altman DG, Laupacis A, Gøtzsche PC, Krleža-Jerić K, Hróbjartsson A, Mann H, Dickersin K, Berlin J, Doré C, Parulekar W, Summerskill W, Groves T, Schulz K, Sox H, Rockhold FW, Rennie D, Moher D. SPIRIT 2013 Statement: Defining standard protocol items for clinical trials. *Ann Intern Med.* 2013;158(3):200-207

|                                             |                     | Reporting Item                                                                                               | Page Number |
|---------------------------------------------|---------------------|--------------------------------------------------------------------------------------------------------------|-------------|
| <b>Administrative information</b>           |                     |                                                                                                              |             |
| Title                                       | <a href="#">#1</a>  | Descriptive title identifying the study design, population, interventions, and, if applicable, trial acronym | 1           |
| Trial registration                          | <a href="#">#2a</a> | Trial identifier and registry name. If not yet registered, name of intended registry                         | 18          |
| Trial registration: data set                | <a href="#">#2b</a> | All items from the World Health Organization Trial Registration Data Set                                     | 24-25       |
| Protocol version                            | <a href="#">#3</a>  | Date and version identifier                                                                                  | 18          |
| Funding                                     | <a href="#">#4</a>  | Sources and types of financial, material, and other support                                                  | 17          |
| Roles and responsibilities: contributorship | <a href="#">#5a</a> | Names, affiliations, and roles of protocol contributors                                                      | 1, 17       |

|    |                           |                     |                                                                      |      |
|----|---------------------------|---------------------|----------------------------------------------------------------------|------|
| 1  | Roles and                 | <a href="#">#5b</a> | Name and contact information for the trial sponsor                   | 18   |
| 2  | responsibilities:         |                     |                                                                      |      |
| 3  | sponsor contact           |                     |                                                                      |      |
| 4  | information               |                     |                                                                      |      |
| 5  |                           |                     |                                                                      |      |
| 6  |                           |                     |                                                                      |      |
| 7  |                           |                     |                                                                      |      |
| 8  | Roles and                 | <a href="#">#5c</a> | Role of study sponsor and funders, if any, in study design;          | n/a  |
| 9  | responsibilities:         |                     | collection, management, analysis, and interpretation of data;        |      |
| 10 | sponsor and funder        |                     | writing of the report; and the decision to submit the report for     |      |
| 11 |                           |                     | publication, including whether they will have ultimate authority     |      |
| 12 |                           |                     | over any of these activities                                         |      |
| 13 |                           |                     |                                                                      |      |
| 14 |                           |                     |                                                                      |      |
| 15 |                           |                     |                                                                      |      |
| 16 | Roles and                 | <a href="#">#5d</a> | Composition, roles, and responsibilities of the coordinating centre, | n/a  |
| 17 | responsibilities:         |                     | steering committee, endpoint adjudication committee, data            |      |
| 18 | committees                |                     | management team, and other individuals or groups overseeing the      |      |
| 19 |                           |                     | trial, if applicable (see Item 21a for data monitoring committee)    |      |
| 20 |                           |                     |                                                                      |      |
| 21 |                           |                     |                                                                      |      |
| 22 |                           |                     |                                                                      |      |
| 23 | <b>Introduction</b>       |                     |                                                                      |      |
| 24 |                           |                     |                                                                      |      |
| 25 | Background and            | <a href="#">#6a</a> | Description of research question and justification for undertaking   | 4-5  |
| 26 | rationale                 |                     | the trial, including summary of relevant studies (published and      |      |
| 27 |                           |                     | unpublished) examining benefits and harms for each intervention      |      |
| 28 |                           |                     |                                                                      |      |
| 29 |                           |                     |                                                                      |      |
| 30 | Background and            | <a href="#">#6b</a> | Explanation for choice of comparators                                | 10   |
| 31 | rationale: choice of      |                     |                                                                      |      |
| 32 | comparators               |                     |                                                                      |      |
| 33 |                           |                     |                                                                      |      |
| 34 |                           |                     |                                                                      |      |
| 35 |                           |                     |                                                                      |      |
| 36 | Objectives                | <a href="#">#7</a>  | Specific objectives or hypotheses                                    | 6-7  |
| 37 |                           |                     |                                                                      |      |
| 38 | Trial design              | <a href="#">#8</a>  | Description of trial design including type of trial (eg, parallel    | 6    |
| 39 |                           |                     | group, crossover, factorial, single group), allocation ratio, and    |      |
| 40 |                           |                     | framework (eg, superiority, equivalence, non-inferiority,            |      |
| 41 |                           |                     | exploratory)                                                         |      |
| 42 |                           |                     |                                                                      |      |
| 43 |                           |                     |                                                                      |      |
| 44 |                           |                     |                                                                      |      |
| 45 | <b>Methods:</b>           |                     |                                                                      |      |
| 46 | <b>Participants,</b>      |                     |                                                                      |      |
| 47 | <b>interventions, and</b> |                     |                                                                      |      |
| 48 | <b>outcomes</b>           |                     |                                                                      |      |
| 49 |                           |                     |                                                                      |      |
| 50 |                           |                     |                                                                      |      |
| 51 |                           |                     |                                                                      |      |
| 52 | Study setting             | <a href="#">#9</a>  | Description of study settings (eg, community clinic, academic        | 7    |
| 53 |                           |                     | hospital) and list of countries where data will be collected.        |      |
| 54 |                           |                     | Reference to where list of study sites can be obtained               |      |
| 55 |                           |                     |                                                                      |      |
| 56 |                           |                     |                                                                      |      |
| 57 | Eligibility criteria      | <a href="#">#10</a> | Inclusion and exclusion criteria for participants. If applicable,    | 8-10 |
| 58 |                           |                     | eligibility criteria for study centres and individuals who will      |      |
| 59 |                           |                     |                                                                      |      |
| 60 |                           |                     |                                                                      |      |

|    |                              |                                                                                            |       |
|----|------------------------------|--------------------------------------------------------------------------------------------|-------|
|    |                              | perform the interventions (eg, surgeons, psychotherapists)                                 |       |
| 1  |                              |                                                                                            |       |
| 2  | Interventions:               | <a href="#">#11a</a> Interventions for each group with sufficient detail to allow          | 8     |
| 3  | description                  | replication, including how and when they will be administered                              |       |
| 4  |                              |                                                                                            |       |
| 5  |                              |                                                                                            |       |
| 6  | Interventions:               | <a href="#">#11b</a> Criteria for discontinuing or modifying allocated interventions for a | 8     |
| 7  | modifications                | given trial participant (eg, drug dose change in response to harms,                        |       |
| 8  |                              | participant request, or improving / worsening disease)                                     |       |
| 9  |                              |                                                                                            |       |
| 10 |                              |                                                                                            |       |
| 11 | Interventions:               | <a href="#">#11c</a> Strategies to improve adherence to intervention protocols, and any    | 13-14 |
| 12 | adherence                    | procedures for monitoring adherence (eg, drug tablet return;                               |       |
| 13 |                              | laboratory tests)                                                                          |       |
| 14 |                              |                                                                                            |       |
| 15 |                              |                                                                                            |       |
| 16 | Interventions:               | <a href="#">#11d</a> Relevant concomitant care and interventions that are permitted or     | 7     |
| 17 | concomitant care             | prohibited during the trial                                                                |       |
| 18 |                              |                                                                                            |       |
| 19 |                              |                                                                                            |       |
| 20 |                              |                                                                                            |       |
| 21 | Outcomes                     | <a href="#">#12</a> Primary, secondary, and other outcomes, including the specific         | 10    |
| 22 |                              | measurement variable (eg, systolic blood pressure), analysis metric                        |       |
| 23 |                              | (eg, change from baseline, final value, time to event), method of                          |       |
| 24 |                              | aggregation (eg, median, proportion), and time point for each                              |       |
| 25 |                              | outcome. Explanation of the clinical relevance of chosen efficacy                          |       |
| 26 |                              | and harm outcomes is strongly recommended                                                  |       |
| 27 |                              |                                                                                            |       |
| 28 |                              |                                                                                            |       |
| 29 |                              |                                                                                            |       |
| 30 | Participant timeline         | <a href="#">#13</a> Time schedule of enrolment, interventions (including any run-ins       | 26    |
| 31 |                              | and washouts), assessments, and visits for participants. A                                 |       |
| 32 |                              | schematic diagram is highly recommended (see Figure)                                       |       |
| 33 |                              |                                                                                            |       |
| 34 |                              |                                                                                            |       |
| 35 |                              |                                                                                            |       |
| 36 | Sample size                  | <a href="#">#14</a> Estimated number of participants needed to achieve study               | 11    |
| 37 |                              | objectives and how it was determined, including clinical and                               |       |
| 38 |                              | statistical assumptions supporting any sample size calculations                            |       |
| 39 |                              |                                                                                            |       |
| 40 |                              |                                                                                            |       |
| 41 | Recruitment                  | <a href="#">#15</a> Strategies for achieving adequate participant enrolment to reach       | 7     |
| 42 |                              | target sample size                                                                         |       |
| 43 |                              |                                                                                            |       |
| 44 |                              |                                                                                            |       |
| 45 | <b>Methods: Assignment</b>   |                                                                                            |       |
| 46 | <b>of interventions (for</b> |                                                                                            |       |
| 47 | <b>controlled trials)</b>    |                                                                                            |       |
| 48 |                              |                                                                                            |       |
| 49 |                              |                                                                                            |       |
| 50 | Allocation: sequence         | <a href="#">#16a</a> Method of generating the allocation sequence (eg, computer-           | 11    |
| 51 | generation                   | generated random numbers), and list of any factors for                                     |       |
| 52 |                              | stratification. To reduce predictability of a random sequence,                             |       |
| 53 |                              | details of any planned restriction (eg, blocking) should be provided                       |       |
| 54 |                              | in a separate document that is unavailable to those who enrol                              |       |
| 55 |                              | participants or assign interventions                                                       |       |
| 56 |                              |                                                                                            |       |
| 57 |                              |                                                                                            |       |
| 58 |                              |                                                                                            |       |
| 59 |                              |                                                                                            |       |
| 60 |                              |                                                                                            |       |

|    |                        |                      |                                                                       |       |
|----|------------------------|----------------------|-----------------------------------------------------------------------|-------|
| 1  | Allocation concealment | <a href="#">#16b</a> | Mechanism of implementing the allocation sequence (eg, central        | 11    |
| 2  | mechanism              |                      | telephone; sequentially numbered, opaque, sealed envelopes),          |       |
| 3  |                        |                      | describing any steps to conceal the sequence until interventions are  |       |
| 4  |                        |                      | assigned                                                              |       |
| 5  |                        |                      |                                                                       |       |
| 6  |                        |                      |                                                                       |       |
| 7  |                        |                      |                                                                       |       |
| 8  | Allocation:            | <a href="#">#16c</a> | Who will generate the allocation sequence, who will enrol             | 11    |
| 9  | implementation         |                      | participants, and who will assign participants to interventions       |       |
| 10 |                        |                      |                                                                       |       |
| 11 | Blinding (masking)     | <a href="#">#17a</a> | Who will be blinded after assignment to interventions (eg, trial      | 12    |
| 12 |                        |                      | participants, care providers, outcome assessors, data analysts), and  |       |
| 13 |                        |                      | how                                                                   |       |
| 14 |                        |                      |                                                                       |       |
| 15 |                        |                      |                                                                       |       |
| 16 |                        |                      |                                                                       |       |
| 17 | Blinding (masking):    | <a href="#">#17b</a> | If blinded, circumstances under which unblinding is permissible,      | 12    |
| 18 | emergency unblinding   |                      | and procedure for revealing a participant's allocated intervention    |       |
| 19 |                        |                      | during the trial                                                      |       |
| 20 |                        |                      |                                                                       |       |
| 21 |                        |                      |                                                                       |       |
| 22 | <b>Methods: Data</b>   |                      |                                                                       |       |
| 23 | <b>collection,</b>     |                      |                                                                       |       |
| 24 | <b>management, and</b> |                      |                                                                       |       |
| 25 | <b>analysis</b>        |                      |                                                                       |       |
| 26 |                        |                      |                                                                       |       |
| 27 |                        |                      |                                                                       |       |
| 28 |                        |                      |                                                                       |       |
| 29 | Data collection plan   | <a href="#">#18a</a> | Plans for assessment and collection of outcome, baseline, and other   | 13    |
| 30 |                        |                      | trial data, including any related processes to promote data quality   |       |
| 31 |                        |                      | (eg, duplicate measurements, training of assessors) and a             |       |
| 32 |                        |                      | description of study instruments (eg, questionnaires, laboratory      |       |
| 33 |                        |                      | tests) along with their reliability and validity, if known. Reference |       |
| 34 |                        |                      | to where data collection forms can be found, if not in the protocol   |       |
| 35 |                        |                      |                                                                       |       |
| 36 |                        |                      |                                                                       |       |
| 37 |                        |                      |                                                                       |       |
| 38 |                        |                      |                                                                       |       |
| 39 | Data collection plan:  | <a href="#">#18b</a> | Plans to promote participant retention and complete follow-up,        | 14    |
| 40 | retention              |                      | including list of any outcome data to be collected for participants   |       |
| 41 |                        |                      | who discontinue or deviate from intervention protocols                |       |
| 42 |                        |                      |                                                                       |       |
| 43 |                        |                      |                                                                       |       |
| 44 | Data management        | <a href="#">#19</a>  | Plans for data entry, coding, security, and storage, including any    | 13-14 |
| 45 |                        |                      | related processes to promote data quality (eg, double data entry;     |       |
| 46 |                        |                      | range checks for data values). Reference to where details of data     |       |
| 47 |                        |                      | management procedures can be found, if not in the protocol            |       |
| 48 |                        |                      |                                                                       |       |
| 49 |                        |                      |                                                                       |       |
| 50 |                        |                      |                                                                       |       |
| 51 | Statistics: outcomes   | <a href="#">#20a</a> | Statistical methods for analysing primary and secondary outcomes.     | 11-12 |
| 52 |                        |                      | Reference to where other details of the statistical analysis plan can |       |
| 53 |                        |                      | be found, if not in the protocol                                      |       |
| 54 |                        |                      |                                                                       |       |
| 55 |                        |                      |                                                                       |       |
| 56 | Statistics: additional | <a href="#">#20b</a> | Methods for any additional analyses (eg, subgroup and adjusted        | 11-12 |
| 57 | analyses               |                      | analyses)                                                             |       |
| 58 |                        |                      |                                                                       |       |
| 59 |                        |                      |                                                                       |       |
| 60 |                        |                      |                                                                       |       |

|    |                            |                      |                                                                         |       |
|----|----------------------------|----------------------|-------------------------------------------------------------------------|-------|
| 1  | Statistics: analysis       | <a href="#">#20c</a> | Definition of analysis population relating to protocol non-             | 11-12 |
| 2  | population and missing     |                      | adherence (eg, as randomised analysis), and any statistical methods     |       |
| 3  | data                       |                      | to handle missing data (eg, multiple imputation)                        |       |
| 4  |                            |                      |                                                                         |       |
| 5  |                            |                      |                                                                         |       |
| 6  | <b>Methods: Monitoring</b> |                      |                                                                         |       |
| 7  |                            |                      |                                                                         |       |
| 8  | Data monitoring:           | <a href="#">#21a</a> | Composition of data monitoring committee (DMC); summary of its          | n/a   |
| 9  | formal committee           |                      | role and reporting structure; statement of whether it is independent    |       |
| 10 |                            |                      | from the sponsor and competing interests; and reference to where        |       |
| 11 |                            |                      | further details about its charter can be found, if not in the protocol. |       |
| 12 |                            |                      | Alternatively, an explanation of why a DMC is not needed                |       |
| 13 |                            |                      |                                                                         |       |
| 14 |                            |                      |                                                                         |       |
| 15 |                            |                      |                                                                         |       |
| 16 |                            |                      |                                                                         |       |
| 17 | Data monitoring:           | <a href="#">#21b</a> | Description of any interim analyses and stopping guidelines,            | n/a   |
| 18 | interim analysis           |                      | including who will have access to these interim results and make        |       |
| 19 |                            |                      | the final decision to terminate the trial                               |       |
| 20 |                            |                      |                                                                         |       |
| 21 |                            |                      |                                                                         |       |
| 22 | Harms                      | <a href="#">#22</a>  | Plans for collecting, assessing, reporting, and managing solicited      | 13    |
| 23 |                            |                      | and spontaneously reported adverse events and other unintended          |       |
| 24 |                            |                      | effects of trial interventions or trial conduct                         |       |
| 25 |                            |                      |                                                                         |       |
| 26 |                            |                      |                                                                         |       |
| 27 | Auditing                   | <a href="#">#23</a>  | Frequency and procedures for auditing trial conduct, if any, and        | 13    |
| 28 |                            |                      | whether the process will be independent from investigators and the      |       |
| 29 |                            |                      | sponsor                                                                 |       |
| 30 |                            |                      |                                                                         |       |
| 31 |                            |                      |                                                                         |       |
| 32 |                            |                      |                                                                         |       |
| 33 | <b>Ethics and</b>          |                      |                                                                         |       |
| 34 | <b>dissemination</b>       |                      |                                                                         |       |
| 35 |                            |                      |                                                                         |       |
| 36 |                            |                      |                                                                         |       |
| 37 | Research ethics            | <a href="#">#24</a>  | Plans for seeking research ethics committee / institutional review      | 18    |
| 38 | approval                   |                      | board (REC / IRB) approval                                              |       |
| 39 |                            |                      |                                                                         |       |
| 40 |                            |                      |                                                                         |       |
| 41 | Protocol amendments        | <a href="#">#25</a>  | Plans for communicating important protocol modifications (eg,           | 18    |
| 42 |                            |                      | changes to eligibility criteria, outcomes, analyses) to relevant        |       |
| 43 |                            |                      | parties (eg, investigators, REC / IRBs, trial participants, trial       |       |
| 44 |                            |                      | registries, journals, regulators)                                       |       |
| 45 |                            |                      |                                                                         |       |
| 46 |                            |                      |                                                                         |       |
| 47 | Consent or assent          | <a href="#">#26a</a> | Who will obtain informed consent or assent from potential trial         | 7     |
| 48 |                            |                      | participants or authorised surrogates, and how (see Item 32)            |       |
| 49 |                            |                      |                                                                         |       |
| 50 |                            |                      |                                                                         |       |
| 51 | Consent or assent:         | <a href="#">#26b</a> | Additional consent provisions for collection and use of participant     | n/a   |
| 52 | ancillary studies          |                      | data and biological specimens in ancillary studies, if applicable       |       |
| 53 |                            |                      |                                                                         |       |
| 54 |                            |                      |                                                                         |       |
| 55 | Confidentiality            | <a href="#">#27</a>  | How personal information about potential and enrolled participants      | 13-14 |
| 56 |                            |                      | will be collected, shared, and maintained in order to protect           |       |
| 57 |                            |                      | confidentiality before, during, and after the trial                     |       |
| 58 |                            |                      |                                                                         |       |
| 59 |                            |                      |                                                                         |       |
| 60 |                            |                      |                                                                         |       |

|    |                                             |                      |                                                                                                                                                                                                                                                                                     |     |
|----|---------------------------------------------|----------------------|-------------------------------------------------------------------------------------------------------------------------------------------------------------------------------------------------------------------------------------------------------------------------------------|-----|
| 1  | Declaration of interests                    | <a href="#">#28</a>  | Financial and other competing interests for principal investigators for the overall trial and each study site                                                                                                                                                                       | 18  |
| 2  |                                             |                      |                                                                                                                                                                                                                                                                                     |     |
| 3  |                                             |                      |                                                                                                                                                                                                                                                                                     |     |
| 4  | Data access                                 | <a href="#">#29</a>  | Statement of who will have access to the final trial dataset, and disclosure of contractual agreements that limit such access for investigators                                                                                                                                     | 14  |
| 5  |                                             |                      |                                                                                                                                                                                                                                                                                     |     |
| 6  |                                             |                      |                                                                                                                                                                                                                                                                                     |     |
| 7  |                                             |                      |                                                                                                                                                                                                                                                                                     |     |
| 8  |                                             |                      |                                                                                                                                                                                                                                                                                     |     |
| 9  |                                             |                      |                                                                                                                                                                                                                                                                                     |     |
| 10 | Ancillary and post trial care               | <a href="#">#30</a>  | Provisions, if any, for ancillary and post-trial care, and for compensation to those who suffer harm from trial participation                                                                                                                                                       | n/a |
| 11 |                                             |                      |                                                                                                                                                                                                                                                                                     |     |
| 12 |                                             |                      |                                                                                                                                                                                                                                                                                     |     |
| 13 |                                             |                      |                                                                                                                                                                                                                                                                                     |     |
| 14 | Dissemination policy: trial results         | <a href="#">#31a</a> | Plans for investigators and sponsor to communicate trial results to participants, healthcare professionals, the public, and other relevant groups (eg, via publication, reporting in results databases, or other data sharing arrangements), including any publication restrictions | 2   |
| 15 |                                             |                      |                                                                                                                                                                                                                                                                                     |     |
| 16 |                                             |                      |                                                                                                                                                                                                                                                                                     |     |
| 17 |                                             |                      |                                                                                                                                                                                                                                                                                     |     |
| 18 |                                             |                      |                                                                                                                                                                                                                                                                                     |     |
| 19 |                                             |                      |                                                                                                                                                                                                                                                                                     |     |
| 20 |                                             |                      |                                                                                                                                                                                                                                                                                     |     |
| 21 | Dissemination policy: authorship            | <a href="#">#31b</a> | Authorship eligibility guidelines and any intended use of professional writers                                                                                                                                                                                                      | 17  |
| 22 |                                             |                      |                                                                                                                                                                                                                                                                                     |     |
| 23 |                                             |                      |                                                                                                                                                                                                                                                                                     |     |
| 24 | Dissemination policy: reproducible research | <a href="#">#31c</a> | Plans, if any, for granting public access to the full protocol, participant-level dataset, and statistical code                                                                                                                                                                     | n/a |
| 25 |                                             |                      |                                                                                                                                                                                                                                                                                     |     |
| 26 |                                             |                      |                                                                                                                                                                                                                                                                                     |     |
| 27 |                                             |                      |                                                                                                                                                                                                                                                                                     |     |
| 28 | <b>Appendices</b>                           |                      |                                                                                                                                                                                                                                                                                     |     |
| 29 |                                             |                      |                                                                                                                                                                                                                                                                                     |     |
| 30 |                                             |                      |                                                                                                                                                                                                                                                                                     |     |
| 31 | Informed consent materials                  | <a href="#">#32</a>  | Model consent form and other related documentation given to participants and authorised surrogates                                                                                                                                                                                  | n/a |
| 32 |                                             |                      |                                                                                                                                                                                                                                                                                     |     |
| 33 |                                             |                      |                                                                                                                                                                                                                                                                                     |     |
| 34 | Biological specimens                        | <a href="#">#33</a>  | Plans for collection, laboratory evaluation, and storage of biological specimens for genetic or molecular analysis in the current trial and for future use in ancillary studies, if applicable                                                                                      | n/a |
| 35 |                                             |                      |                                                                                                                                                                                                                                                                                     |     |
| 36 |                                             |                      |                                                                                                                                                                                                                                                                                     |     |
| 37 |                                             |                      |                                                                                                                                                                                                                                                                                     |     |
| 38 |                                             |                      |                                                                                                                                                                                                                                                                                     |     |
| 39 |                                             |                      |                                                                                                                                                                                                                                                                                     |     |

40 The SPIRIT checklist is distributed under the terms of the Creative Commons Attribution License CC-BY-ND  
 41 3.0. This checklist was completed on 03. September 2019 using <https://www.goodreports.org/>, a tool made by  
 42 the [EQUATOR Network](#) in collaboration with [Penelope.ai](#)  
 43  
 44  
 45  
 46  
 47  
 48  
 49  
 50  
 51  
 52  
 53  
 54  
 55  
 56  
 57  
 58  
 59
